1  
2 **Virus genomes from deep sea sediments expand the ocean megavirome and support**  
3 **independent origins of viral gigantism**  
4

5 Disa Bäckström<sup>1,\*</sup>, Natalya Yutin<sup>2,\*</sup>, Steffen L. Jørgensen<sup>3</sup>, Jennah Dharamshi<sup>1</sup>, Felix Homa<sup>1</sup>, Katarzyna  
6 Zaremba-Niedwiedzka<sup>1</sup>, Anja Spang<sup>1,4</sup>, Yuri I. Wolf<sup>2</sup>, Eugene V. Koonin<sup>2,#</sup>, Thijs J. G. Ettema<sup>1,#</sup>

7  
8 <sup>1</sup>Department of Cell and Molecular Biology, Science for Life Laboratory, Uppsala University, Box 596,  
9 Uppsala SE-75123, Sweden

10 <sup>2</sup>National Center for Biotechnology Information, National Library of Medicine. National Institutes of Health,  
11 Bethesda, MD 20894, USA

12 <sup>3</sup>Department of Biology, Centre for Geobiology, University of Bergen, N-5020 Bergen, Norway

13 <sup>4</sup>NIOZ, Royal Netherlands Institute for Sea Research, Department of Marine Microbiology and  
14 Biogeochemistry, and Utrecht University, P.O. Box 59, NL-1790 AB Den Burg, The Netherlands

15  
16 \* These authors have contributed equally.

17  
18 #For correspondence: [koonin@ncbi.nlm.nih.gov](mailto:koonin@ncbi.nlm.nih.gov); [thijs.ettema@icm.uu.se](mailto:thijs.ettema@icm.uu.se)

## 20 **Abstract**

21 The Nucleocytoplasmic Large DNA Viruses (NCLDV) of eukaryotes (proposed order "Megavirales")  
22 include the families *Poxviridae*, *Asfarviridae*, *Iridoviridae*, *Ascoviridae*, *Phycodnaviridae*, *Marseilleviridae*,  
23 and *Mimiviridae*, as well as still unclassified Pithoviruses, Pandoraviruses, Molliviruses and Faustoviruses.  
24 Several of these virus groups include giant viruses, with genome and particle sizes exceeding those of many  
25 bacterial and archaeal cells. We explored the diversity of the NCLDV in deep-sea sediments from the Loki's  
26 Castle hydrothermal vent area. Using metagenomics, we reconstructed 23 high quality genomic bins of novel  
27 NCLDV, 15 of which are closest related to Pithoviruses, 5 to Marseilleviruses, 1 to Iridoviruses, and 2 to  
28 Klosneuviruses. Some of the identified Pitho-like and Marseille-like genomes belong to deep branches in the  
29 phylogenetic tree of core NCLDV genes, substantially expanding the diversity and phylogenetic depth of the  
30 respective groups. The discovered viruses have a broad range of apparent genome sizes including putative giant  
31 members of the family *Marseilleviridae*, in agreement with multiple, independent origins of gigantism in  
32 different branches of the NCLDV. Phylogenomic analysis reaffirms the monophyly of the Pitho-Irido-Marseille  
33 branch of NCLDV. Similarly to other giant viruses, the Pitho-like viruses from Loki's Castle encode translation  
34 systems components. Phylogenetic analysis of these genes indicates a greater bacterial contribution than  
35 detected previously. Genome comparison suggests extensive gene exchange between members of the Pitho-like  
36 viruses and *Mimiviridae*. Further exploration of the genomic diversity of "Megavirales" in additional sediment  
37 samples is expected to yield new insights into the evolution of giant viruses and the composition of the ocean  
38 megavirome.

## 40 **Importance**

41 Genomics and evolution of giant viruses is one of the most vigorously developing areas of virus research.  
42 Lately, metagenomics has become the main source of new virus genomes. Here we describe a metagenomic  
43 analysis of the genomes of large and giant viruses from deep sea sediments. The assembled new virus genomes

44 substantially expand the known diversity of the Nucleo-Cytoplasmic Large DNA Viruses of eukaryotes. The  
45 results support the concept of independent evolution of giant viruses from smaller ancestors in different virus  
46 branches.

## 47 **Introduction**

48       The nucleocytoplasmic large DNA viruses (NCLDV) comprise an expansive group of viruses that infect  
49 diverse eukaryotes (1). Most of the NCLDV share the defining biological feature of reproducing (primarily) in  
50 the cytoplasm of the infected cells as well as several genes encoding proteins involved in the key roles in virus  
51 morphogenesis and replication, leading to the conclusion that the NCLDV are monophyletic, that is, evolved  
52 from a single ancestral virus (2, 3). As originally defined in 2001, the NCLDV included 5 families of viruses:  
53 *Poxviridae*, *Asfarviridae*, *Iridoviridae*, *Ascoviridae*, and *Phycodnaviridae* (2). Subsequent isolation of viruses  
54 from protists has resulted in the stunning discovery of giant viruses, with genome sizes exceeding those of many  
55 bacteria and archaea (4-8). The originally discovered group of giant viruses has formed the family *Mimiviridae*  
56 (9-13). Subsequently, 3 additional other groups of giant viruses have been identified, namely, Pandoraviruses  
57 (14-16); Pithoviruses, Cedratviruses and Orpheovirus (hereafter, the latter 3 groups of related viruses are  
58 collectively referred to as the putative family "Pithoviridae") (17-19), and *Mollivirus sibericum* (20), along  
59 with two new groups of NCLDV with moderate-sized genomes, the family *Marseilleviridae* (21, 22), and  
60 Faustoviruses (23, 24). Most of the NCLDV have icosahedral virions composed of a double jelly roll major  
61 capsid proteins but Poxviruses have distinct brick-shaped virions, ascoviruses have ovoid virions, Mollivirus  
62 has a spherical virion, finally, Pandoraviruses and Pithoviruses have unusual, amphora-shaped virions.. The  
63 Pithovirus virions are the largest among the currently known viruses. Several of the recently discovered groups

64 of NCLDV are likely to eventually become new families in particular, the putative ; family "Pithoviridae" (25),  
65 and reclassification of the NCLDV into a new virus order "Megavirales" has been proposed (26, 27).

66 Phylogenomic reconstruction of gene gain and loss events resulted in mapping about 50 genes that are  
67 responsible for the key viral functions to the putative last common ancestor of the NCLDV, reinforcing the  
68 conclusion on their monophyly (3, 28). However, detailed phylogenetic analysis of these core genes of the  
69 NCLDV has revealed considerable evolutionary complexity including numerous cases of displacement of  
70 ancestral genes with homologs from other sources, and even some cases of independent capture of homologous  
71 genes (29). The genomes of the NCLDV encompass from about 100 (some iridoviruses) to nearly 2500 genes  
72 (pandoraviruses) that, in addition to the 50 or so core genes, include numerous genes involved in various  
73 aspects of virus-host interaction, in particular, suppression of the host defense mechanisms, as well as many  
74 genes for which no function could be identified (1, 30).

75 The NCLDV include some viruses that are agents of devastating human and animal diseases, such as  
76 smallpox virus or African swine fever virus (31, 32), as well as viruses that infect algae and other planktonic  
77 protists and are important ecological agents (12, 33-35). Additionally, NCLDV elicit strong interest of many  
78 researchers due to their large genome size which, in the case of the giant viruses, falls within the range of  
79 typical genome size of bacteria and archaea. This apparent exceptional position of the giant viruses in the  
80 virosphere, together with the fact that they encode multiple proteins that are universal among cellular  
81 organisms, in particular, translation system components, has led to provocative scenarios of the origin and

82 evolution of giant viruses. It has been proposed that the giant viruses were descendants of a hypothetical,  
83 probably, extinct fourth domain of cellular life that evolved via drastic genome reduction, and support of this  
84 scenario has been claimed from phylogenetic analysis of aminoacyl-tRNA synthetases encoded by giant viruses  
85 (5, 26, 36-40). However, even apart from the conceptual difficulties inherent in the postulated cell to virus  
86 transition (41, 42), phylogenetic analysis of expanded sets of translation-related proteins encoded by giant  
87 viruses has resulted in tree topologies that were poorly compatible with the fourth domain hypothesis but rather  
88 suggest piecemeal acquisition of these genes, likely, from different eukaryotic hosts (43-46).

89 More generally, probabilistic reconstruction of gene gains and losses during the evolution of the  
90 NCLDV has revealed a highly dynamic evolutionary regime (3, 28, 29, 45, 46) that has been conceptualized in  
91 the so-called genomic accordion model under which virus evolution proceeds via alternating phases of  
92 extensive gene capture and gene loss (47, 48). In particular, in the course of the NCLDV evolution, giant  
93 viruses appear to have evolved from smaller ones on multiple, independent occasions (45, 49, 50).

94 In recent years, metagenomics has become the principal route of new virus discovery (51-53). However,  
95 in the case of giant viruses, *Acanthamoeba* co-culturing has remained the main source of new virus  
96 identification, and this methodology has been refined to allow for high-throughput giant virus isolation (54, 55).  
97 To date, over 150 species of giant viruses have been isolated from various environments, including water  
98 towers, soil, sewage, rivers, fountains, seawater, and marine sediments (56). The true diversity of giant viruses  
99 is difficult to assess, but the explosion of giant virus discovery during the last ten years, and large scale  
100 metagenomic screens of viral diversity indicates that a major part of the Earth's virome remains unexplored  
101 (57). The core genes of the NCLDV can serve as baits for screening environmental sequences, and pipelines

102 have been developed for large scale screening of metagenomes (56, 58). Although these efforts have given  
103 indications of the presence of uncharacterized giant viruses in samples from various environments, few of these  
104 putative novel viruses can be characterized due to the lack of genomic information. Furthermore, giant viruses  
105 tend to be overlooked in viral metagenomic studies since samples are typically filtered according to the  
106 preconception of typical virion sizes (52).

107 To gain further insight into the ecology, evolution, and genomic content of giant viruses, it is necessary  
108 to retrieve more genomes, not simply establish their presence by detection of single marker genes.

109 Metagenomic binning is the process of clustering environmental sequences that belong to the same genome,  
110 based on features such as base composition and coverage. Binning has previously been used to reconstruct the  
111 genomes of large groups of uncharacterized bacteria and archaea in a culture-independent approach (59, 60).  
112 Only one case of binning has been reported for NCLDV, when the genomes of the Klosneuviruses, distant  
113 relatives of the Mimiviruses, were reconstructed from a simple wastewater sludge metagenome (46). More  
114 complex metagenomes from all types of environments remain to be explored. However, standard methods for  
115 screening and binning of NCLDV have not yet been developed, and sequences of these viruses can be difficult  
116 to classify because of substantial horizontal gene transfer from bacteria and eukaryotes (13, 29, 43, 49), and also  
117 because a large proportion of the NCLDV genes (known as ORFans) have no detectable homologs (25, 30).

118 We identified NCLDV sequences in deep sea sediment metagenomes from Loki's Castle, a sample site  
119 that has been previously shown to be rich in uncharacterized prokaryotes (61, 62) (Dharamshi et. al. 2018  
120 (submitted)). The complexity of the data and genomes required a combination of different binning methods,  
121 assembly improvement by reads profiling, and manual refinement of each bin to minimize contamination with  
122 non-viral sequences. As a result, 23 high quality genomic bins of novel NCLDV were reconstructed, including,  
123 mostly, distant relatives of "Pithoviridae", Orpheovirus, and *Marseilleviridae*, as well as two relatives of  
124 Klosneuviruses. These findings substantially expand the diversity of the NCLDV, in particular, the Pitho-Irido-

125 Marseille (PIM) branch, further support the scenario of independent evolution of giant viruses from smaller  
126 ones in different branches of the NCLDV, and provide an initial characterization of the ocean megavirome.  
127

## 128

## 129 **Materials and Methods**

### 130

### 131 **Sampling and metagenomic sequencing**

132 In the previous studies of microbial diversity in the deep sea sediments, samples were retrieved from three sites  
133 about 15 km north east of the Loki's castle hydrothermal vent field (Table S1 of Additional File 1), by gravity  
134 (GS10\_GC14, GS08\_GC12) and piston coring (GS10\_PC15) (61, 63, 64).  
135

136 DNA was extracted and sequenced, and metagenomes were assembled as part of the previous studies ((61) for  
137 GS10\_GC14, Dharamshi et. al. 2018 (submitted) for GS08\_GC12 and GS10\_PC15), resulting in the assemblies  
138 LKC75, KR126, K940, K1000, and K1060. Contiguous sequences (contigs) longer than 1kb were selected for  
139 further processing.  
140

### 141 **Identification of viral metagenomic sequences**

142 Protein sequences of the metagenomic contigs were predicted using Prodigal v.2.6.3 (65), in the metagenomics  
143 mode. A collection of DNA polymerase family B (DNAP) sequences from 11 NCLDV was used to query the  
144 metagenomic protein sequence with BLASTP ( (66), Table S1 of Additional File 1). The BLASTP hits were  
145 filtered according to e-value (maximum  $1e^{-5}$ ), alignment length (at least 50% of the query length) and identity  
146 (greater than 30%). The sequences were aligned using MAFFT-LINSI (67). Reference NCLDV DNAP  
147 sequences were extracted from the NCVOG collection (28). Highly divergent sequences and those containing  
148 large gaps inserts were removed from the alignment, followed by re-alignment. The terminal regions of the



149 alignments were trimmed manually using Jalview (68), and internal gaps were removed using trimAl  
150 (v.1.4.rev15, (69)) with the option “gappyout”. IQTree version 1.5.0a (70) was used to construct maximum  
151 likelihood phylogenies with 1000 ultrafast bootstrap replications (71). The built-in model test (72) was used to  
152 select the best evolutionary model according to the Bayesian information criterion (LG+F+I+G4; Figure S1 of  
153 Additional File 1). Contigs belonging to novel NCLDV s were identified and used for binning.

### 155 **Composition-based binning (ESOM)**

156 All sequences of the assemblies KR126, K940, K1000 and K1060 were split into fragments of minimum 5 or  
157 10 kb length at intervals of 5 or 10 kb, and clustered by tetranucleotide frequencies using Emergent Self  
158 Organizing maps (ESOM, (73)), generating one map per assembly. Bins were identified by viewing the maps  
159 using Databionic ESOM viewer (<http://databionic-esom.sourceforge.net/>), and manually choosing the contigs  
160 clustering together with the putative NCLDV contigs in an “island” (Figure S3 of Additional File 1).

### 162 **Differential coverage binning of metagenomic contigs**

163 Differential coverage (DC) bins were generated for the KR126, K940, K1000, and K1060 metagenomes,  
164 according to Dharamshi et. al. 2018 (submitted). Briefly, Kallisto version 0.42.5 (74) was used to get the  
165 differential coverage data of each read mapped onto each focal metagenome, that was used by CONCOCT  
166 version 0.4.1 to collect sequences into bins (75). CONCOCT was run with three different contig size thresholds:  
167 2kb, 3kb, and 5kb, and longer contigs were cut up into smaller fragments (10 kb), to decrease coverage and  
168 compositional bias, and merged again after CONCOCT binning (See Dharamshi et. al. 2018 (submitted) for  
169 further details). Bins containing contigs with the viral DNAP were selected and refined in mmgenome (76)).  
170 Finally, to resolve overlapping sequences in the DC bins, the reads of each bin were extracted using seqtk  
171 (version 1.0-r82-dirty, <https://github.com/lh3/seqtk>) and the reads mapping files generated for mmgenome, and

172 reassembled using SPAdes (3.6.0, multi-cell, --careful mode, (77)). Bins from KR126 had too low coverage and  
173 quality, and were discarded from further analysis.

### 174 175 **Co-assembly binning of metagenomic contigs**

176 CLARK (78), a program for classification of reads using discriminative k-mers, was used to identify reads  
177 belonging to NCLDV in the metagenomes. A target set of 10 reference genomes that represented  
178 Klosneuviruses, *Marseilleviridae*, and "Pithoviridae" (Table S2 of Additional File 1) , as well as the 29 original  
179 bins, were used to make a database of spaced k-mers which CLARK used to classify the reads of the K940,  
180 K1000 and K1060 metagenomes (full mode, k-mer size 31). Reads classified as related to any of the targets  
181 were extracted and the reads from all three metagenomes were pooled and reassembled using SPAdes (3.9.0,  
182 (77)). Because CLARK removes not-discriminatory k-mers , the reads for sequences that are similar between  
183 the bins might not have been included. Therefore, the reads from each original bin that were used for the first  
184 set reassemblies, were also included, and pooled with the CLARK-classified reads before reassembly.

185  
186 Four SPAdes modes were tested: metagenomic (--meta), single-cell (--sc), multi-cell (default), and multi-cell  
187 careful (--careful). The quality of the assemblies was tested by identifying the contigs containing NCV0G0038  
188 (DNA polymerase), using BLASTP (66). The multi-cell careful assembly had the longest DNAP-containing  
189 contigs and was used for CONCOCT binning.

190  
191 CONCOCT was run as above, only using reads from the co-assembly as input. Bins containing NCV0G0038  
192 were identified by BLASTP. The smaller the contig size threshold, the more ambiguous and potentially  
193 contaminating sequences were observed, so the CONCOCT 5 kb run was chosen to extract and refine new bins.  
194 The bins were refined by using mmgenome as described below.

## 196 **Quality assessment and refinement of metagenomic NCLDV bins**

197 General sequence statistics were calculated by Quast (v. 3.2 , (79)). Barnap (v 0.8; (80)) was used to check for  
198 the presence of rRNA genes, with a length threshold of 0.1. Prokka (v1.12, (79)) was used to annotate open  
199 reading frames (ORFs) of the raw bins. Megavirus marker gene presence in each metagenomic bin was  
200 estimated by using the micomplete pipeline (<https://bitbucket.org/evolegiolab/micomplete>) and a set of the 10  
201 conserved NCLDV genes (Table S3 of Additional File 1). This information was used to assess completeness  
202 and redundancy. Presence of more than one copy of each marker gene was considered an indication of potential  
203 contamination or the presence of more than one viral genome per bin, and such bins were further refined.  
204

205 Mmgenome was used to manually refine the metagenomic bins by plotting coverage and GC-content, showing  
206 reads linkage, and highlighting contigs with marker genes (76). Overlap between the ESOM binned contigs and  
207 the DC bins was also visualized. Bins containing only one genome were refined by removing contigs with  
208 different composition and coverage. In cases when several genomes were represented in the same CONCOCT  
209 bin, they were separated into different bins when distinct clusters were clearly visible (see the Supplementary  
210 Materials of Additional File 1 for examples of the refining process).

211 Reads linkage was determined by mapping the metagenomic reads onto the assembly using bowtie2 (version  
212 2.3.2, (81)), samtools (version 1.2, (82)) to index and convert the mapping file into bam format, and finally a  
213 script provided by the CONCOCT suite to count the number of read pairs that were mapping to the first or last 1  
214 kb of two different contigs (`bam_to_linkage.py, --regionlength 1000`).

215  
216 Diamond aligner Blastp (83) was used to query the protein sequences of the refined bins against the NCBI non-  
217 redundant protein database (latest date of search: February 13 2018), with maximum e-value  $1e^{-5}$ . Taxonomic  
218 information from the top BLASTP hit for each gene was used for taxonomic filtering. Contigs were identified

219 as likely contaminants and removed if they had 50% or more bacterial or archaeal hits compared to no  
220 significant hits, and no viral or eukaryotic hits.

221  
222 The assemblies of the DC and CA bins were compared by aligning the contigs with nucmer (part of  
223 MUMmer3.23,(84)) and an in-house script for visualization (see Additional File 1 for more details).

### 226 **Assessment of NCLDV diversity**

227 Environmental sequences, downloaded in March 2017 from TARA Oceans ((85),  
228 <https://www.ebi.ac.uk/ena/about/tara-oceans-assemblies>), and EarthVirome ( (57), available at  
229 <https://img.jgi.doe.gov/vr/>) were combined with the metagenomic sequences from Loki's Castle (Table S1 of  
230 Additional file 1) and screened for sequences related to the Loki's Castle NCLDVs using BLASTP search with  
231 the bin DNAP sequences as queries. The BLASTP hits were filtered according to e-value (maximum  $1e^{-5}$ ), HSP  
232 length (at least 50% of the query length) and identity above 30%. The sequences were extracted using  
233 blastdbcmd, followed by alignment and phylogenetic tree reconstruction as described above (Figure 1).

### 235 **Sequence annotation and phylogenetic analysis**

236 The sequences of the selected bins were translated with MetaGeneMark (86). tRNA genes were predicted using  
237 tRNAscan-SE online (87). Predicted proteins were annotated using their best hits to NCVOG, cdd, and *nr*  
238 databases. In addition, Pitho-, Marseille-, Iridovirus-related bins were annotated using protein clusters  
239 constructed as described below. Reference sequences were collected from corresponding NCVOG and cdd  
240 profiles, and from GenBank, using BLASTP searches initiated from the Loki's Castle NCLDV proteins.  
241 Reference sequences for Loki's Castle virophages were retrieved by BLAST and tBLASTn searches against  
242 genomic (*nr*) and metagenomic (environmental wgs) parts of GenBank, with the predicted Loki's Castle

243 virophage MCP as queries. The retrieved environmental virophage genome fragments were translated with  
244 MetaGeneMark. Homologous sequences were aligned using MUSCLE (88). For phylogenetic reconstruction,  
245 gapped columns (more than 30% of gaps) and columns with low information content were removed from the  
246 alignments (89); the filtered alignments were used for tree reconstructions using FastTree (90). The alignments  
247 of three conserved NCLDV proteins were concatenated and used for phylogenetic analysis with PhyML ((91),  
248 <http://www.atgc-montpellier.fr/phyml-sms/>) The best model identified by PhyML was LG +G+I+F (LG  
249 substitution model, gamma distributed site rates with gamma shape parameter estimated from the alignment;  
250 fraction of invariable sites estimated from the alignment; and empirical equilibrium frequencies).

## 251 **Protein sequence clusters**

252 Two sets of viral proteins, Pitho-Irido-Marseillevirus group (PIM clusters,  
253 [ftp://ftp.ncbi.nih.gov/pub/yutinn/Loki\\_Castle\\_NCLDV\\_2018/PIM\\_clusters/](ftp://ftp.ncbi.nih.gov/pub/yutinn/Loki_Castle_NCLDV_2018/PIM_clusters/)) and NCLDV (NCLDV clusters,  
254 [ftp://ftp.ncbi.nih.gov/pub/yutinn/Loki\\_Castle\\_NCLDV\\_2018/NCLDV\\_clusters/](ftp://ftp.ncbi.nih.gov/pub/yutinn/Loki_Castle_NCLDV_2018/NCLDV_clusters/)) were used separately to obtain  
255 two sets of protein clusters, using an iterative clustering and alignment procedure, organized as follows

- 257 • **initial sequence clustering:** Initially, sequences were clustered using UCLUST (92) with the similarity  
258 threshold of 0.5; clustered sequences were aligned using MUSCLE, singletons were converted to  
259 pseudo-alignments consisting of just one sequence. Sites containing more than 67% of gaps were  
260 temporarily removed from alignments and the pairwise similarity scores were obtained for clusters  
261 using HHSEARCH. Scores for a pair of clusters were converted to distances [the  
262  $d_{A,B} = -\log(s_{A,B}/\min(s_{A,A},s_{B,B}))$  formula was used to convert scores  $s$  to distances  $d$ ] a UPGMA guide  
263 tree was produced from a pairwise distance matrix. A progressive pairwise alignment of the clusters at  
264 the tree leaves was constructed using HHALIGN (93), resulting in larger clusters. The procedure was  
265 repeated iteratively, until all sequences with detectable similarity over at least 50% of their lengths

266 were clustered and aligned together. Starting from this set of clusters, several rounds of the following  
267 procedures were performed.

- 268 • **cluster merging and splitting:** PSI-BLAST (94) search using the cluster alignments to construct  
269 Position-Specific Scoring Matrices (PSSMs) was run against the database of cluster consensus  
270 sequences. Scores for pairs of clusters were converged to a distance matrix as described above;  
271 UPGMA trees were cut using at the threshold depth; unaligned sequences from the clusters were  
272 collected and aligned together. An approximate ML phylogenetic tree was constructed from each of  
273 these alignments using FastTree (WAG evolutionary model, gamma-distributed site rates). The tree  
274 was split into subtrees so as to minimize paralogy and maximize species (genome) coverage.  
275 Formally, for a subtree containing  $k$  genes belonging to  $m$  genomes ( $k \geq m$ ) in the tree with the total of  
276  $n$  genomes ( $n \geq m$ ) genomes, the “autonomy” value was calculated as  $(m/k)(m/n)(a/b)^{1/6}$  (where  $a$  is the  
277 length of the basal branch of the subtree and  $b$  is the length of the longest internal branch in the entire  
278 tree). This approach gives advantage to subtrees with the maximum representation of genomes,  
279 minimum number of paralogs and separated by a long internal branch. If a subtree with the maximum  
280 autonomy value was different from the complete tree, it was pruned from the tree, recorded as a  
281 separate cluster, and the remaining tree was analyzed again.
- 282 • **cluster cutting and joining:** Results of PSI-BLAST search whereby the cluster alignments were used  
283 as PSSMS and run against the database of cluster consensus sequences were analyzed for instances  
284 where a shorter cluster alignment had a full-length match to a longer cluster containing fewer  
285 sequences. This situation triggered cutting the longer alignment into fragments matching the shorter  
286 alignment(s). Alignment fragments were then passed through the merge-and-split procedure described  
287 above. If the fragments of the cluster that was cut did not merge into other clusters, the cut was rolled  
288 back, and the fragments were joined.

- 289
- **cluster mapping and realigning:** PSI-BLAST search using the cluster alignments as PSSMs was run against the original database. Footprints of cluster hits were collected, assigned to their respective highest-scoring query cluster and aligned, forming the new set of clusters mirroring the original set.
  - **post-processing:** The PIM group clusters were manually curated and annotated using the NCVOG, CDD and HHPRED matches as guides. For the NCLDV clusters, the final round clusters with strong reciprocal PSI-BLAST hits and with compatible phyletic patterns (using the same autonomy value criteria as described above) were combined into clusters of homologs that maximized genome representation and minimized paralogy. The correspondence between the previous version of NCVOGs and the current clusters was established by running PSI-BLAST with the NCVOG alignments as PSSMs against the database of cluster consensus sequences.
- 298

### 299 **Genome similarity dendrogram**

300 Binary phyletic patterns of the NCLDV clusters (whereby 1 indicates a presence of the given cluster in the  
301 given genome) were converted to intergenomic distances as follows:  $d_{X,Y} = -\log(N_{X,Y}/(N_X N_Y)^{1/2})$  where  $N_X$  and  $N_Y$   
302 are the number of COGs present in genomes  $X$  and  $Y$  respectively and  $N_{X,Y}$  is the number of COGs shared by  
303 these two genomes. A genome similarity dendrogram was reconstructed from the matrix of pairwise distances  
304 using the Neighbor-Joining method (95).

### 305 **Conserved motif search**

306 The sequences from the LCV genomic bins were searched for potential promoters as follows. For every  
307 predicted ORF, ‘upstream’ genome fragments (from 250 nucleotides upstream to 30 nucleotides downstream of  
308 the predicted translation start codons) were extracted; short fragments (less than 50 nucleotides) were excluded;  
309 the resulting sequence sets were searched for recurring ungapped motifs using MEME software, with motif  
310 width set to either 25, 12, or 8 nucleotides (96). The putative LCV virophage promoter was used as a template

311 to search upstream fragments of LCMiAC01 and LCMiAC02 with FIMO online tool (96). The motifs were  
312 visualized using the Weblogo tool (97).

313

314 **Data availability**

315 The nucleotide sequences reported in this work have been deposited in GenBank under the accession numbers  
316 X00001-X0000N.



## 317 **Results**

### 318 **Putative NCLDV in the Loki's Castle metagenome**

319

320

321 Screening of the Loki's Castle metagenomes, for NCLDV DNA polymerase sequences revealed remarkable  
322 diversity (Figure 1, Figure S2, Additional File 1). Using two main binning approaches, namely, differential  
323 coverage binning (DC), and co-assembly binning (CA) (Figure 2), we retrieved 23 high quality bins of putative  
324 new NCLDVs (Table 1). The highest quality bins were identified by comparing the DC and the CA bins, based  
325 on decreasing the total number of contigs and the number of contigs without NCLDV hits, while preserving  
326 completeness (Additional File 1, Table S6).

327

328 Differential coverage binning was performed first, resulting in 29 genomic bins. Initial quality assessment  
329 showed that most of the bins were inflated and fragmented, containing many short contigs (<5kb), which were  
330 difficult to classify as contamination or *bona fide* NCLDV sequences, and some bins were likely to contain  
331 sequences from more than one viral genome, judged by the presence of marker genes belonging to different  
332 families of the NCLDV (Additional file 1, Figures S19-S20). The more contigs a bin contains, the higher the  
333 risk is that some of these could be contaminants that bin together because of similar nucleotide composition and  
334 read coverage. Therefore, sequence read profiling followed by co-assembly binning was performed in an  
335 attempt to increase the size of the contigs and thus obtain additional information for binning and bin refinement.  
336 For most of the bins, the co-assembly led to a decrease in the number of contigs, without losing completeness or  
337 even improving it (Additional file 1, Table S6).

338

339 A key issue with metagenomic binning is whether contigs are binned together because they belong to the same  
340 genome, or rather because they simply display a similar nucleotide composition and read coverage. In general,

341 contigs were retained if they contained at least one gene with BLASTP top hits to NCLDV proteins. Some  
342 contigs encoded proteins with only bacterial, archaeal, and/or eukaryotic BLASTP top hits, and because the  
343 larger NCLDV genomes contain islands enriched in genes of bacterial origin (43, 49), it was unclear which  
344 sequences could potentially be contaminants. A combination of gene content, coverage and composition  
345 information was used to identify potential contaminating sequences. Contigs shorter than 5 kb were also  
346 discarded because they generally do not contain enough information to reliably establish their origin, but this  
347 strict filtering also means that the size of the genomes could be underestimated and some genomic information  
348 lost. Reassuringly, no traces of ribosomal RNA or ribosomal protein genes were identified in any of the  
349 NCLDV genome bins, which would have been a clear case of contaminating cellular sequences. Altogether, of  
350 the 336 contigs in the 23 final genome bins, 243 (72%) could be confidently assigned to NCLDV on the basis of  
351 the presence of at least one NCLDV-specific gene.

352  
353 The content of the 23 NCLDV-related bins was analyzed in more depth (Table 1). The bins included from 1 to  
354 30 contigs, with the total length of non-overlapping sequences varying from about 200 to more than 750  
355 kilobases (kb), suggesting that some might contain (nearly) complete NCLDV genomes although it is difficult  
356 to make any definitive conclusions on completeness from length alone because the genome size of even closely  
357 related NCLDV can vary substantially. A much more reliable approach is to assess the representation of core  
358 genes that are expected to be conserved in (nearly) all NCLDV. The translated protein sequences from the 23  
359 bins were searched for homologs of conserved NCLDV genes using PSI-BLAST, with profiles of the NCVOGs  
360 employed as queries ((28); see Additional File 2 for protein annotation). Of the 23 bins, in 14 (nearly) complete  
361 sets of the core NCLDV genes were identified (Table 1) suggesting that these bins contained (nearly) complete  
362 genomes of putative new viruses (hereafter, LCV, Loki's Castle Viruses). Notably, the Pithovirus-like LCV  
363 lack the packaging ATPase of the FtsK family that is encoded in all other NCLDV genomes but not in the  
364 available Pithovirus genomes. Several bins contained more than one copy of certain conserved genes. Some of

365 these could represent actual paralogs but, given that duplication of most of these conserved genes (e.g. DNA  
366 Polymerase in Bin LCPAC202 or RNA polymerase B subunit in Bins LCPAC201 and LCPAC202) is  
367 unprecedented among NCLDV, it appears likely that several bins are heterogeneous, each containing sequences  
368 from two closely related virus genomes.

369 With all the caution due because of the lack of fully assembled virus genomes, the range of the apparent  
370 genomes sizes of the Pitho-like and Marseille-like LCV is notable (Table 1). The characteristic size of the  
371 genomes in the family "Pithoviridae" is about 600 kb (17-19) but, among the Pitho-like LCV, only one,  
372 LCPAC304, reached and even exceeded that size. The rest of the LCV genomes are substantially smaller, and  
373 although some are likely to be incomplete, given that certain core genes are missing, others, such as  
374 LCPAC104, with the total length of contigs at only 218 kb, encompass all the core genes (Table 1).

375 The typical genome size in the family *Marseilleviridae* is between 350 and 400 kb (22) but among the LCV,  
376 genomes of two putative Marseille-like viruses, LCMAC101 and LCMAC202, appear to exceed 700 kb, well  
377 into the giant virus range. Although LCMAC202 contains two uncharacteristic duplications of core genes,  
378 raising the possibility of heterogeneity, LCMAC101 contains all core genes in a single copy, and thus, appears  
379 to be an actual giant virus. Thus, the family *Marseilleviridae* seems to be joining the NCLDV families that  
380 evolved virus gigantism.

381  
382 A concatenation of the three most highly conserved proteins, namely, NCLDV major capsid protein (MCP),  
383 DNA polymerase (DNAP), and A18-like helicase (A18Hel), was used for phylogenetic analysis (see Methods  
384 for details). Among the putative new NCLDV, 15 cluster with Pithoviruses (Figure 3). These new  
385 representatives greatly expand the scope of the family "Pithoviridae". Indeed, 8 of the 15 form a putative  
386 (weakly supported) clade that is the sister group of all currently known "Pithoviridae" (Pithovirus, Cedratvirus

387 and Orpheovirus), 5 more comprise a deeper clade, and LCDPAC02 represents the deepest lineage of the Pitho-  
388 like viruses (Figure 3). Additionally, 5 of the putative new NCLDV are affiliated with the family  
389 *Marseilleviridae*, and similarly to the case of Pitho-like viruses, two of these comprise the deepest branch in the  
390 Marseille-like subtree (although the monophyly of this subtree is weakly supported) (Figure 3). Another LCV  
391 represents a distinct lineage within the family *Iridoviridae* (Figure 3). The topologies of the phylogenetic trees  
392 for individual conserved NCLDV genes were mostly compatible with these affinities of the putative new  
393 viruses (Additional File 3). Taken together, these findings substantially expand the Pitho-Irido-Marseille (PIM)  
394 clade of the NCLDV, and the inclusion of the LCV in the phylogeny confidently reaffirms the previously  
395 observed monophyly of this branch (Figure 3). Finally, two LCV belong to the Klosneuvirus branch (putative  
396 subfamily “Klosneuvirinae”) within the family *Mimiviridae* (Figure 3, inset).

### 398 **Translation system components encoded by Loki’s Castle viruses**

399 Similar to other NCLDV with giant and large genomes, the LCV show a patchy distribution of genes coding  
400 for translation system components. Such genes were identified in 11 of the 23 bins (Table 2; Additional File 2).  
401 None of the putative new viruses has a (near) complete set of translation-related genes (minus the ribosome) as  
402 observed in Klosneuviruses (46) or Tupanviruses (98). Nevertheless, several of the putative Pitho-like viruses  
403 encode multiple translation-related proteins, e.g. Bin LCMAC202 that encompasses 6 aminoacyl-tRNA  
404 synthetases (aaRS) and 6 translation factors or Bin LCMAC201, with 4 aaRS and 5 translation factors (Table  
405 2). Additionally, 12 of the 23 bins encode predicted tRNAs, up to 22 in Bin LCMAC202 (Table 2).  
406  
407  
408

409 Given the special status of the translation system components in the discussions of the NCLDV evolution, we  
410 constructed phylogenies for all these genes including the LCV and all other NCLDV. The results of this  
411 phylogenetic analysis (Figure 4 and Additional File 3) reveal complex evolutionary trends some of which that

412 have not been apparent in previous analyses of the NCLDV evolution. First, in most cases when multiple LCV  
413 encompass genes for homologous translation system components, phylogenetic analysis demonstrates  
414 polyphyly of these genes. Notable examples include translation initiation factor eIF2b, aspartyl/asparaginyl-  
415 tRNA synthetase (AsnS), tyrosyl-tRNA synthetase (TyrS) and methionyl-tRNA synthetase (MetS; Figure 4).  
416 Thus, the eIF2b tree includes 3 unrelated LCV branches one of which, not unexpectedly, clusters with  
417 homologs from Marseilleviruses and Mimiviruses, another one is affiliated with two Klosneuviruses, and the  
418 third one appears to have an independent eukaryotic origin (Figure 4a). The AsnS tree includes a group of LCV  
419 that clusters within a mixed bacterial and archaeal branch that also includes two other NCLDV, namely,  
420 Hokovirus of the Klosneuvirus group and a phycodnavirus. Another LCV AsnS belongs to a group of apparent  
421 eukaryotic origin and one, finally, belongs to a primarily archaeal clade (Figure 4b and Additional File 3). Of  
422 the 3 TyrS found in LCV, two cluster with the homologs from Klosneuviruses within a branch of apparent  
423 eukaryotic origin, and the third one in another part of the same branch where it groups with the Orpheovirus  
424 TyrS; notably, the same branch includes homologs from pandoraviruses (Figure 4c). Of the two MetS, one  
425 groups with homologs from Klosneuviruses whereas the other one appears to be of an independent eukaryotic  
426 origin (Figure 4d). These observations are compatible with the previous conclusions on multiple, parallel  
427 acquisitions of genes for translation system components by different groups of NCLDV (primarily, giant viruses  
428 but, to a lesser extent, also those with smaller genomes), apparently, under evolutionary pressure for modulation  
429 of host translation that remains to be studied experimentally.

430  
431 Another clear trend among the translation-related genes of the Pitho-like LCV is the affinity of several of  
432 them with homologs from Klosneuviruses and, in some cases, Mimiviruses. All 4 examples mentioned about  
433 include genes of this provenance, and additional cases are GlyS, IleS, ProS, peptidyl-tRNA hydrolase,  
434 translation factors eIF1a and eIF2a, and peptide chain release factor eRF1 (Additional File 3). Given that the  
435 LCV set includes two Klosneuvirus-like bins, in addition to the Pitho-like ones, these observations imply

436 extensive gene exchange between distinct NCLDV in the habitats from which these viruses originate.  
437 Klosneuviruses that are conspicuously rich in translation-related genes might serve as the main donors.

### 440 **Gene content analysis of the Loki's Castle viruses**

441  
442 Given that the addition of the LCV has greatly expanded the family *Marseilleviridae* and the Pithovirus  
443 group, and reaffirmed the monophyly of the PIM branch of NCLDV, we constructed, analyzed and annotated  
444 clusters of putative orthologous genes for this group of viruses as well as an automatically generated version of  
445 clusters of homologous genes for all NCLDV  
([ftp://ftp.ncbi.nih.gov/pub/yutinn/Loki\\_Castle\\_NCLDV\\_2018/NCLDV\\_clusters/](ftp://ftp.ncbi.nih.gov/pub/yutinn/Loki_Castle_NCLDV_2018/NCLDV_clusters/)). Altogether, 8066 NCLDV  
447 gene clusters were identified of which a substantial majority were family-specific. Nevertheless, almost 200  
448 clusters were found to be shared between Pithoviridae and *Marseilleviridae* families (Figure 5). The numbers of  
449 genes shared by each of these families with *Iridoviridae* were much smaller, conceivably, because of the small  
450 genome size of iridoviruses that could have undergone reductive evolution (Figure 5). Conversely, there was  
451 considerable overlap between the PIM group gene clusters and those of mimiviruses, presumably, due to the  
452 large genome sizes of the mimiviruses, but potentially reflecting also substantial horizontal gene flow between  
453 mimiviruses and pitho- and marseilleviruses (Figure 5). Only 13 genes comprised a genomic signature of the  
454 PIM group, that is, genes that were shared by its three constituent families, to the exclusion of the rest of the  
455 NCLDV.

456  
457 To further explore the relationships between the gene repertoires of the PIM group and other NCLDV, we  
458 constructed a neighbor-joining tree from the data on gene presence-absence  
([ftp://ftp.ncbi.nih.gov/pub/yutinn/Loki\\_Castle\\_NCLDV\\_2018/NCLDV\\_clusters/](ftp://ftp.ncbi.nih.gov/pub/yutinn/Loki_Castle_NCLDV_2018/NCLDV_clusters/)). Notwithstanding the limited  
460 gene sharing, the topology of the resulting tree (Figure 6) closely recapitulated the phylogenetic tree of the  
461 conserved core genes (Figure 3). In particular, the PIM group appears as a clade in the gene presence-absence

462 tree albeit with a comparatively low support (Figure 6). Thus, despite the paucity of PIM-specific genes and the  
463 substantial differences in the genome sizes between the three virus families, gene gain and loss processes within  
464 the viral genetic core appear to track the evolution of the universally conserved genes.

465  
466 The genomes of microbes and large viruses encompass many lineage-specific genes (often denoted ORFans)  
467 that, in the course of evolution, are lost and gained by horizontal gene transfer at extremely high rates (99).  
468 Therefore, the gene repertoire of a microbial or viral species (notwithstanding the well-known difficulties with  
469 the species definition) or group is best characterized by the pangenome, i.e. the entirety of genes represented in  
470 all isolates in the group (100-102). Most microbes have “open” pangenomes such that every sequenced genome  
471 adds new genes to the pangenome (102, 103). The NCLDV pangenomes could be even wider open, judging  
472 from the high percentage of ORFans, especially, in giant viruses (104). Examination of the PIM genes clusters  
473 shows that 757 of the 1572 clusters (48%) were unique to the LCV, that is, had no detectable homologs in other  
474 members of the group. Taking into account also the 4147 ORFans, the LCV represent the bulk of the PIM group  
475 pangenome. Among the NCLDV clusters, 1100 of the 8066 (14%) are LCV-specific. Thus, notwithstanding the  
476 limitations of the automated clustering procedure that could miss some distant similarities between proteins, the  
477 discovery of the LCV substantially expands not only the pangenome of the PIM group but also the overall  
478 NCLDV pangenome.

479  
480 Annotation of the genes characteristic of (but not necessarily exclusive to) the PIM group reveals numerous,  
481 highly diverse functions of either bacterial or eukaryotic provenance as suggested by the taxonomic affiliations  
482 of homologs detected in database searches (Additional file 5). For example, a functional group of interest shared  
483 by the three families in the PIM group include genes of apparent bacterial origin involved in various DNA  
484 repair processes and nucleotide metabolism. The results of phylogenetic analysis of these genes are generally  
485 compatible with bacterial origin although many branches are mixed, including also archaea and/or eukaryotes

486 and indicative of horizontal gene transfer (Figure 7). Notably, these trees illustrate the “hidden complexity” of  
487 NCLDV evolution whereby homologous genes are independently captured by different groups of viruses. In the  
488 trees for the two subunits of the SbcCD nuclease, the PIM group forms a clade but the homologs in mimiviruses  
489 appear to be of distinct origin (Figure 7A,B) whereas in the trees for exonuclease V and dNMP kinase, the PMI  
490 group itself splits between 3 branches (Figure 7C,D). The latter two trees also contain branches in which  
491 different groups of the NCLDV, in particular, marseilleviruses and mimiviruses, are mixed, apparently  
492 reflecting genes exchange between distinct viruses infecting the same host, such as amoeba.

### 495 **Loki’s Castle virophages**

496 Many members of the family *Mimiviridae* are associated with small satellite viruses that became known as  
497 virophages (subsequently classified in the family *Lavidaviridae* (105-111). Two virophage-like sequences were  
498 retrieved from Loki Castle metagenomes. According to the MCP phylogeny, they form a separate branch within  
499 the Sputnik-like group (Figure 8A). This affiliation implies that these virophages are parasites of mimiviruses.  
500 Both Loki’s Castle virophages encode the core virophage genes encoding the proteins involved in virion  
501 morphogenesis, namely, MCP, minor capsid protein, packaging ATPase, and cysteine protease (Figure 8B and  
502 Additional File 2 for protein annotations). Apart from these core genes, however, these virophages differ from  
503 Sputnik. In particular, they lack the gene for the primase-helicase fusion protein that is characteristic of Sputnik  
504 and its close relatives (112), but each encode a distinct helicase (Figure 8B).

### 506 **Putative promoter motifs in LCV and Loki’s Castle virophages**

507 To identify possible promoter sequences in the LCV genomes, we searched upstream regions of the predicted  
508 LCV genes for recurring motifs using the MEME software (see Methods for details). In most of the bins, we  
509 identified a conserved motif similar to the early promoters of poxviruses and mimiviruses (113) (AAAnTGA)



510 that is typically located within 40 to 20 nucleotides upstream of the predicted start codon (for the search results,  
511 see: [ftp://ftp.ncbi.nih.gov/pub/yutinn/Loki\\_Castle\\_NCLDV\\_2018/meme\\_motif\\_search/](ftp://ftp.ncbi.nih.gov/pub/yutinn/Loki_Castle_NCLDV_2018/meme_motif_search/)). To assess possible bin  
512 contamination, we calculated frequencies of the conserved motifs per contig, for Marseillevirus-like and  
513 Mimivirus-like bins. None of the contigs showed significantly reduced frequency of the conserved motif  
514 (Additional file 7), supporting the virus origin of all the contigs.

515  
516 Notably, the LCV virophage genomes also contain a conserved AT-rich motif upstream of each gene which is  
517 likely to correspond to the late promoter of their hosts, similarly to the case of the Sputnik virophage that carries  
518 late mimivirus promoters (114). However, the genomes of the two putative Klosneuviruses LCMiAC01 nor  
519 LCMiAC02 that are represented among the LCV do not contain obvious counterparts to these predicted  
520 virophage promoters (Additional file 8). Therefore, it appears most likely that the hosts of these virophages are  
521 mimiviruses that are not represented in the LCV sequence set.

522  
523 Of further interest is the detection of pronounced promoter-like motifs for pitho-like LCV (Additional file 9)  
524 and irido-like LCV (Additional file 10). To our knowledge, no conserved promoter motifs have been so far  
525 identified for these groups of viruses.

## 526 527 528 **Discussion**

529  
530 Metagenomics has become the primary means of new virus discovery (51, 52, 115). Metagenomic sequence  
531 analysis has greatly expanded many groups of viruses such that the viruses that have been identified earlier by  
532 traditional methods have become isolated branches in the overall evolutionary trees in which most of the  
533 diversity comes from metagenomic sequences (116-121). The analysis of the Loki's Castle metagenome

534 reported here has similarly expanded the Pithovirus branch of the NCLDV, and to a somewhat lesser extent, the  
535 Marseillevirus branch. Although only one LCV genome, that of a Marseille-like virus, appears to be complete  
536 and on a single contig, several other genomes seem to be near complete, and overall, the LCV genomic data are  
537 sufficient to dramatically expand the pangenome of the PIM group, to add substantially to the NCLDV  
538 pangenome as well, and to reveal notable evolutionary trends. One of such trends is the apparent independent  
539 origin of giant viruses in more than one clade within both the Pithovirus and the Marseillevirus branches.  
540 Although this observation should be interpreted with caution, given the lack of fully assembled LCV genomes,  
541 it supports and extends the previous conclusions on the dynamic nature of NCLDV evolution (“genomic  
542 accordion”) that led to the independent, convergent evolution of viral gigantism in several, perhaps, even all  
543 NCLDV families (45, 48, 122, 123). Conversely, these findings are incompatible with the concept of reductive  
544 evolution of NCLDV from giant viruses as the principal evolutionary mode. Another notable evolutionary trend  
545 emerging from the LCV genome comparison is the apparent extensive gene exchange between Pitho-like and  
546 Marseille-like viruses, and members of the *Mimiviridae*. Finally, it is important to note that the LCV analysis  
547 reaffirms, on a greatly expanded dataset, the previously proposed monophyly of the PIM group of the NCLDV,  
548 demonstrating robustness of the evolutionary analysis of conserved NCLDV genes (28, 45). Furthermore, a  
549 congruent tree topology was obtained by gene content analysis, indicating that, despite the open pangenomes  
550 and the dominance of unique genes, evolution of the genetic core of the NCLDV appears to track the sequence  
551 divergence of the universal marker genes.

552  
553 Like other giant viruses, several LCV encode multiple translation system components. Although none of  
554 them rivals the near complete translation systems encoded by Klosneuviruses (46), Orpheovirus (19), and  
555 especially, Tupanviruses (98), some are comparable, in this regard, to the Mimiviruses (45). The diverse origins  
556 of the translation system components in LCV suggested by phylogenetic analysis are compatible with the

557 previous conclusions on the piecemeal capture of these genes by giant viruses as opposed to inheritance from a  
558 common ancestor (43, 45).

559  
560 The 23 NCLDV genome bins reconstructed in the present study only represent a small fraction of the full  
561 NCLDV diversity as determined by DNA polymerase sequences present in marine sediments (Figure 1).  
562 Notably, sequences closely matching the sequences in the NCLDV genome bins were identified only in the  
563 Loki's Castle metagenomes, not in TARA oceans water column metagenomes or Earth Virome sequences.  
564 Thus, the deep sea sediments represent a unique and unexplored habitat for NCLDVs. Further studies targeting  
565 deep sea sediments will bring new insights into the diversity and genomic potential of these viruses.

566  
567 Identification of the host range is one of the most difficult problems in metaviromics and also in the study of  
568 giant viruses, even by traditional methods. Most of the giant viruses have been isolated by co-cultivation with  
569 model amoeba species, and the natural hosts remains unknown. Notable exceptions are the giant viruses isolated  
570 from marine flagellates *Cafeteria roenbergensis* (12) and *Bodo saltans* (35). The principal approach for  
571 inferring the virus host range from metagenomics data is the analysis of co-occurrence of virus sequences with  
572 those of potential hosts (124, 125). However, virtually no 18S rRNA gene sequences of eukaryotic origin were  
573 detected in the Loki's Castle sediment samples, in a sharp contrast to the rich prokaryotic microbiota (61, 62).  
574 The absence of potential eukaryotic hosts of the LCV strongly suggests that these viruses do not reproduce in  
575 the sediments but rather could originate from virus particles that precipitate from different parts of the water  
576 column. So far, however, closely related sequences have not been found in water column metagenomes (Figure  
577 1). The eukaryotic hosts might have inhabited the shallower sediments, and although they have decomposed  
578 over time, the resilient virus particles remain as a "fossil record". Clearly, the hosts of these viruses remain to be  
579 identified. An obvious and important limitation of this work – and any metagenomic study – is that the viruses  
580 discovered here (we are now in a position to call the viruses without quotes, given the recent decisions of the

581 ICTV) have not been grown in a host culture. Accordingly, our understanding of their biology is limited to the  
582 inferences made from the genomic sequence which, per force, cannot yield the complete picture. In the case of  
583 the NCLDV, these limitations are exacerbated by the fact that their genomic DNA is not infectious, and  
584 therefore, even the availability of the complete genome does not provide for growing the virus. The  
585 metagenomic analyses must complement rather than replace traditional virology and newer culturomic  
586 approaches.

587  
588 Although the sediment samples used in this study have not been dated directly, determinations of  
589 sedimentation rates in nearby areas show that these rates vary between 1-5 cm per 1000 years (126, 127). With  
590 the fastest sedimentation rate considered, the sediments could be over 20,600 years old at the shallowest depth  
591 (103 cm). Considering that *Pithovirus sibericum* and *Mollivirus sibericum* were revived from 30,000 year old  
592 permafrost (17, 20), it might be possible to resuscitate some of the LCVs using similar methods. Isolation  
593 experiments with giant viruses from deep sea sediments, now that we are aware of their presence, would be the  
594 natural next step to learn more about their biology.

595  
596 Regardless, the discovery of the LCV substantially expands the known ocean megavirome and demonstrates  
597 the previously unsuspected high prevalence of Pitho-like viruses. Given that all this diversity comes from a  
598 single site on the ocean floor, it appears clear that the megavirome is large and diverse, and metagenomics  
599 analysis of NCLDV from other sites will bring many surprises.

## 601 **Acknowledgements**

602 We acknowledge the help from chief scientist R. B. Pedersen, the scientific party and the entire crew on board  
603 the Norwegian research vessel G.O. Sars during the summer 2008, 2010 and 2014 expeditions. We thank the  
604 Uppsala Multidisciplinary Center for Advanced Computational Science (UPPMAX) at Uppsala University and

605 the Swedish National Infrastructure for Computing (SNIC) at the PDC Center for High-Performance  
606 Computing for providing computational resources. This work was supported by grants of the European  
607 Research Council (ERC Starting grant 310039-PUZZLE\_CELL), the Swedish Foundation for Strategic  
608 Research (SSF-FFL5) and the Swedish Research Council (VR grant 2015-04959) to T.J.G.E., N.Y., YIW, and  
609 E.V.K. are funded through the Intramural Research program of the National Institutes of Health of the USA.  
610

## References

1. **Koonin EV, Yutin N.** 2010. Origin and evolution of eukaryotic large nucleo-cytoplasmic DNA viruses. *Intervirology*. **53**(5):284-292.
2. **Iyer LM, Aravind L, Koonin EV.** 2001. Common origin of four diverse families of large eukaryotic DNA viruses. *J Virol*. **75**(23):11720-11734.
3. **Iyer LM, Balaji S, Koonin EV, Aravind L.** 2006. Evolutionary genomics of nucleo-cytoplasmic large DNA viruses. *Virus Res*. **117**(1):156-184.
4. **La Scola B , et al.** 2003. A giant virus in amoebae. *Science*. **299**(5615):2033.
5. **Raoult D , et al.** 2004. The 1.2-megabase genome sequence of Mimivirus. *Science*. **306**(5700):1344-1350.
6. **Koonin EV.** 2005. Virology: Gulliver among the Lilliputians. *Curr Biol*. **15**(5):R167-169.
7. **Claverie JM , et al.** 2006. Mimivirus and the emerging concept of "giant" virus. *Virus Res*. **117**(1):133-144.
8. **Fischer MG.** 2016. Giant viruses come of age. *Curr Opin Microbiol*. **31**:50-57.
9. **Suzan-Monti M, La Scola B, Raoult D.** 2006. Genomic and evolutionary aspects of Mimivirus. *Virus Res*. **117**(1):145-155.
10. **Claverie JM, Abergel C, Ogata H.** 2009. Mimivirus. *Curr Top Microbiol Immunol*. **328**:89-121.
11. **Claverie JM , et al.** 2009. Mimivirus and Mimiviridae: giant viruses with an increasing number of potential hosts, including corals and sponges. *J Invertebr Pathol*. **101**(3):172-180.
12. **Fischer MG, Allen MJ, Wilson WH, Suttle CA.** 2010. Giant virus with a remarkable complement of genes infects marine zooplankton. *Proc Natl Acad Sci U S A*. **107**(45):19508-19513.
13. **Yutin N, Colson P, Raoult D, Koonin EV.** 2013. Mimiviridae: clusters of orthologous genes, reconstruction of gene repertoire evolution and proposed expansion of the giant virus family. *Virol J*. **10**:106.
14. **Philippe N , et al.** 2013. Pandoraviruses: amoeba viruses with genomes up to 2.5 Mb reaching that of parasitic eukaryotes. *Science*. **341**(6143):281-286.
15. **Yutin N, Koonin EV.** 2013. Pandoraviruses are highly derived phycodnaviruses. *Biol Direct*. **8**:25.
16. **Legendre M , et al.** 2018. Diversity and evolution of the emerging Pandoraviridae family. *Nat Commun*. **9**(1):2285.
17. **Legendre M , et al.** 2014. Thirty-thousand-year-old distant relative of giant icosahedral DNA viruses with a pandoravirus morphology. *Proc Natl Acad Sci U S A*. **111**(11):4274-4279.
18. **Andreani J , et al.** 2016. Cedratvirus, a Double-Cork Structured Giant Virus, is a Distant Relative of Pithoviruses. *Viruses*. **8**(11).
19. **Andreani J , et al.** 2017. Orpheovirus IHUMI-LCC2: A New Virus among the Giant Viruses. *Front Microbiol*. **8**:2643.

- 647 20. **Legendre M , et al.** 2015. In-depth study of Mollivirus sibericum, a new 30,000-y-old giant virus  
648 infecting Acanthamoeba. Proc Natl Acad Sci U S A. **112**(38):E5327-5335.
- 649 21. **Boyer M , et al.** 2009. Giant Marseillevirus highlights the role of amoebae as a melting pot in  
650 emergence of chimeric microorganisms. Proc Natl Acad Sci U S A. **106**(51):21848-21853.
- 651 22. **Colson P , et al.** 2013. "Marseilleviridae", a new family of giant viruses infecting amoebae. Arch Virol.  
652 **158**(4):915-920.
- 653 23. **Reteno DG , et al.** 2015. Faustovirus, an asfarvirus-related new lineage of giant viruses infecting  
654 amoebae. J Virol. **89**(13):6585-6594.
- 655 24. **Benamar S , et al.** 2016. Faustoviruses: Comparative Genomics of New Megavirales Family Members.  
656 Front Microbiol. **7**:3.
- 657 25. **Abergel C, Legendre M, Claverie JM.** 2015. The rapidly expanding universe of giant viruses:  
658 Mimivirus, Pandoravirus, Pithovirus and Mollivirus. FEMS Microbiol Rev. **39**(6):779-796.
- 659 26. **Colson P, de Lamballerie X, Fournous G, Raoult D.** 2012. Reclassification of giant viruses  
660 composing a fourth domain of life in the new order Megavirales. Intervirology. **55**(5):321-332.
- 661 27. **Colson P , et al.** 2013. "Megavirales", a proposed new order for eukaryotic nucleocytoplasmic large  
662 DNA viruses. Arch Virol. **158**(12):2517-2521.
- 663 28. **Yutin N, Wolf YI, Raoult D, Koonin EV.** 2009. Eukaryotic large nucleo-cytoplasmic DNA viruses:  
664 clusters of orthologous genes and reconstruction of viral genome evolution. Virol J. **6**:223.
- 665 29. **Yutin N, Koonin EV.** 2012. Hidden evolutionary complexity of Nucleo-Cytoplasmic Large DNA  
666 viruses of eukaryotes. Virol J. **9**:161.
- 667 30. **Boyer M, Gimenez G, Suzan-Monti M, Raoult D.** 2010. Classification and determination of possible  
668 origins of ORFans through analysis of nucleocytoplasmic large DNA viruses. Intervirology. **53**(5):310-  
669 320.
- 670 31. Moss B: **Poxviridae: the viruses and their replication.** In: *Fields Virology*. Edited by Fields BN,  
671 Knipe DM, Howley PM, Griffin DE, vol. 2, 4th edn. Philadelphia: Lippincott, Williams & Wilkins;  
672 2001: 2849-2884.
- 673 32. **Galindo I, Alonso C.** 2017. African Swine Fever Virus: A Review. Viruses. **9**(5).
- 674 33. **Suttle CA.** 2007. Marine viruses--major players in the global ecosystem. Nat Rev Microbiol. **5**(10):801-  
675 812.
- 676 34. **Rohwer F, Thurber RV.** 2009. Viruses manipulate the marine environment. Nature. **459**(7244):207-  
677 212.
- 678 35. **Deeg CM, Chow CT, Suttle CA.** 2018. The kinetoplastid-infecting Bodo saltans virus (BsV), a window  
679 into the most abundant giant viruses in the sea. Elife. **7**.
- 680 36. **Claverie JM.** 2006. Viruses take center stage in cellular evolution. Genome Biol. **7**(6):110.

- 681 37. **Colson P, Gimenez G, Boyer M, Fournous G, Raoult D.** 2011. The giant Cafeteria roenbergensis  
682 virus that infects a widespread marine phagocytic protist is a new member of the fourth domain of Life.  
683 PLoS One. **6**(4):e18935.
- 684 38. **Legendre M, Arslan D, Abergel C, Claverie JM.** 2012. Genomics of Megavirus and the elusive fourth  
685 domain of Life. Commun Integr Biol. **5**(1):102-106.
- 686 39. **Nasir A, Kim KM, Caetano-Anolles G.** 2012. Giant viruses coexisted with the cellular ancestors and  
687 represent a distinct supergroup along with superkingdoms Archaea, Bacteria and Eukarya. BMC Evol  
688 Biol. **12**:156.
- 689 40. **Nasir A, Kim KM, Caetano-Anolles G.** 2017. Phylogenetic Tracings of Proteome Size Support the  
690 Gradual Accretion of Protein Structural Domains and the Early Origin of Viruses from Primordial Cells.  
691 Front Microbiol. **8**:1178.
- 692 41. **Lopez-Garcia P.** 2012. The place of viruses in biology in light of the metabolism- versus-replication-  
693 first debate. Hist Philos Life Sci. **34**(3):391-406.
- 694 42. **Forterre P, Krupovic M, Prangishvili D.** 2014. Cellular domains and viral lineages. Trends Microbiol.  
695 **22**(10):554-558.
- 696 43. **Moreira D, Brochier-Armanet C.** 2008. Giant viruses, giant chimeras: the multiple evolutionary  
697 histories of Mimivirus genes. BMC Evol Biol. **8**:12.
- 698 44. **Williams TA, Embley TM, Heinz E.** 2011. Informational gene phylogenies do not support a fourth  
699 domain of life for nucleocytoplasmic large DNA viruses. PLoS One. **6**(6):e21080.
- 700 45. **Yutin N, Wolf YI, Koonin EV.** 2014. Origin of giant viruses from smaller DNA viruses not from a  
701 fourth domain of cellular life. Virology.
- 702 46. **Schulz F , et al.** 2017. Giant viruses with an expanded complement of translation system components.  
703 Science. **356**(6333):82-85.
- 704 47. **Elde NC , et al.** 2012. Poxviruses deploy genomic accordions to adapt rapidly against host antiviral  
705 defenses. Cell. **150**(4):831-841.
- 706 48. **Filee J.** 2013. Route of NCLDV evolution: the genomic accordion. Curr Opin Virol. **3**(5):595-599.
- 707 49. **Filee J, Pouget N, Chandler M.** 2008. Phylogenetic evidence for extensive lateral acquisition of  
708 cellular genes by Nucleocytoplasmic large DNA viruses. BMC Evol Biol. **8**:320.
- 709 50. **Filee J, Chandler M.** 2010. Gene exchange and the origin of giant viruses. Intervirology. **53**(5):354-  
710 361.
- 711 51. **Simmonds P , et al.** 2017. Consensus statement: Virus taxonomy in the age of metagenomics. Nat Rev  
712 Microbiol. **15**(3):161-168.
- 713 52. **Zhang YZ, Shi M, Holmes EC.** 2018. Using Metagenomics to Characterize an Expanding Virosphere.  
714 Cell. **172**(6):1168-1172.
- 715 53. **Koonin EV, Dolja VV.** 2018. Metaviromics: a tectonic shift in understanding virus evolution. Virus  
716 Res. **246**:A1-A3.



- 717 54. **Pagnier I , et al.** 2013. A decade of improvements in Mimiviridae and Marseilleviridae isolation from  
718 amoeba. *Intervirology*. **56**(6):354-363.
- 719 55. **Khalil JY , et al.** 2016. High-Throughput Isolation of Giant Viruses in Liquid Medium Using  
720 Automated Flow Cytometry and Fluorescence Staining. *Front Microbiol*. **7**:26.
- 721 56. **Halary S, Temmam S, Raoult D, Desnues C.** 2016. Viral metagenomics: are we missing the giants?  
722 *Curr Opin Microbiol*. **31**:34-43.
- 723 57. **Paez-Espino D , et al.** 2016. Uncovering Earth's virome. *Nature*. **536**(7617):425-430.
- 724 58. **Verneau J, Lévasseur A, Raoult D, La Scola B, Colson P.** 2016. MG-Digger: An Automated Pipeline  
725 to Search for Giant Virus-Related Sequences in Metagenomes. *Front Microbiol*. **7**:428.
- 726 59. **Brown CT , et al.** 2015. Unusual biology across a group comprising more than 15% of domain  
727 Bacteria. *Nature*. **523**(7559):208-211.
- 728 60. **Spang A, Caceres EF, Ettema TJG.** 2017. Genomic exploration of the diversity, ecology, and  
729 evolution of the archaeal domain of life. *Science*. **357**(6351).
- 730 61. **Spang A , et al.** 2015. Complex archaea that bridge the gap between prokaryotes and eukaryotes.  
731 *Nature*. **521**(7551):173-179.
- 732 62. **Zaremba-Niedzwiedzka K , et al.** 2017. Asgard archaea illuminate the origin of eukaryotic cellular  
733 complexity. *Nature*. **541**(7637):353-358.
- 734 63. **Jorgensen SL , et al.** 2012. Correlating microbial community profiles with geochemical data in highly  
735 stratified sediments from the Arctic Mid-Ocean Ridge. *Proc Natl Acad Sci U S A*. **109**(42):E2846-2855.
- 736 64. **Jorgensen SL, Thorseth IH, Pedersen RB, Baumberger T, Schleper C.** 2013. Quantitative and  
737 phylogenetic study of the Deep Sea Archaeal Group in sediments of the Arctic mid-ocean spreading  
738 ridge. *Front Microbiol*. **4**:299.
- 739 65. **Hyatt D , et al.** 2010. Prodigal: prokaryotic gene recognition and translation initiation site identification.  
740 *BMC Bioinformatics*. **11**:119.
- 741 66. **Camacho C , et al.** 2009. BLAST+: architecture and applications. *BMC Bioinformatics*. **10**:421.
- 742 67. **Katoh K, Standley DM.** 2013. MAFFT multiple sequence alignment software version 7: improvements  
743 in performance and usability. *Mol Biol Evol*. **30**(4):772-780.
- 744 68. **Waterhouse AM, Procter JB, Martin DM, Clamp M, Barton GJ.** 2009. Jalview Version 2--a  
745 multiple sequence alignment editor and analysis workbench. *Bioinformatics*. **25**(9):1189-1191.
- 746 69. **Capella-Gutierrez S, Silla-Martinez JM, Gabaldon T.** 2009. trimAl: a tool for automated alignment  
747 trimming in large-scale phylogenetic analyses. *Bioinformatics*. **25**(15):1972-1973.
- 748 70. **Nguyen LT, Schmidt HA, von Haeseler A, Minh BQ.** 2015. IQ-TREE: a fast and effective stochastic  
749 algorithm for estimating maximum-likelihood phylogenies. *Mol Biol Evol*. **32**(1):268-274.
- 750 71. **Hoang DT, Chernomor O, von Haeseler A, Minh BQ, Vinh LS.** 2018. UFBoot2: Improving the  
751 Ultrafast Bootstrap Approximation. *Mol Biol Evol*. **35**(2):518-522.

72. **Kalyaanamoorthy S, Minh BQ, Wong TKF, von Haeseler A, Jermin LS.** 2017. ModelFinder: fast model selection for accurate phylogenetic estimates. *Nat Methods*. **14**(6):587-589.
73. **Dick GJ , et al.** 2009. Community-wide analysis of microbial genome sequence signatures. *Genome Biol*. **10**(8):R85.
74. **Bray NL, Pimentel H, Melsted P, Pachter L.** 2016. Near-optimal probabilistic RNA-seq quantification. *Nat Biotechnol*. **34**(5):525-527.
75. **Alneberg J , et al.** 2014. Binning metagenomic contigs by coverage and composition. *Nat Methods*. **11**(11):1144-1146.
76. **Karst SM, Kirkegaard RH, Albertsen M.** 2016. Mmgenome: a toolbox for reproducible genome extraction from metagenomes. *bioRxiv* **059121**.
77. **Bankevich A , et al.** 2012. SPAdes: a new genome assembly algorithm and its applications to single-cell sequencing. *J Comput Biol*. **19**(5):455-477.
78. **Ounit R, Wanamaker S, Close TJ, Lonardi S.** 2015. CLARK: fast and accurate classification of metagenomic and genomic sequences using discriminative k-mers. *BMC Genomics*. **16**:236.
79. **Gurevich A, Saveliev V, Vyahhi N, Tesler G.** 2013. QUAST: quality assessment tool for genome assemblies. *Bioinformatics*. **29**(8):1072-1075.
80. **Seemann T.** 2013. Ten recommendations for creating usable bioinformatics command line software. *Gigascience*. **2**(1):15.
81. **Langmead B, Salzberg SL.** 2012. Fast gapped-read alignment with Bowtie 2. *Nat Methods*. **9**(4):357-359.
82. **Li H, Durbin R.** 2009. Fast and accurate short read alignment with Burrows-Wheeler transform. *Bioinformatics*. **25**(14):1754-1760.
83. **Buchfink B, Xie C, Huson DH.** 2015. Fast and sensitive protein alignment using DIAMOND. *Nat Methods*. **12**(1):59-60.
84. **Kurtz S , et al.** 2004. Versatile and open software for comparing large genomes. *Genome Biol*. **5**(2):R12.
85. **Sunagawa S , et al.** 2015. Ocean plankton. Structure and function of the global ocean microbiome. *Science*. **348**(6237):1261359.
86. **Zhu W, Lomsadze A, Borodovsky M.** 2010. Ab initio gene identification in metagenomic sequences. *Nucleic Acids Res*. **38**(12):e132.
87. **Lowe TM, Chan PP.** 2016. tRNAscan-SE On-line: integrating search and context for analysis of transfer RNA genes. *Nucleic Acids Res*. **44**(W1):W54-57.
88. **Edgar RC.** 2004. MUSCLE: multiple sequence alignment with high accuracy and high throughput. *Nucleic Acids Res*. **32**(5):1792-1797.
89. **Yutin N, Makarova KS, Mekhedov SL, Wolf YI, Koonin EV.** 2008. The deep archaeal roots of eukaryotes. *Mol Biol Evol*. **25**(8):1619-1630.

- 788 90. **Price MN, Dehal PS, Arkin AP.** 2010. FastTree 2--approximately maximum-likelihood trees for large  
789 alignments. *PLoS ONE*. **5**(3):e9490.
- 790 91. **Guindon S, Gascuel O.** 2003. A simple, fast, and accurate algorithm to estimate large phylogenies by  
791 maximum likelihood. *Syst Biol*. **52**(5):696-704.
- 792 92. **Edgar RC.** 2010. Search and clustering orders of magnitude faster than BLAST. *Bioinformatics*.  
793 **26**(19):2460-2461.
- 794 93. **Soding J.** 2005. Protein homology detection by HMM-HMM comparison. *Bioinformatics*. **21**(7):951-  
795 960.
- 796 94. **Altschul SF , et al.** 1997. Gapped BLAST and PSI-BLAST: a new generation of protein database search  
797 programs. *Nucleic Acids Res*. **25**(17):3389-3402.
- 798 95. **Saitou N, Nei M.** 1987. The neighbor-joining method: a new method for reconstructing phylogenetic  
799 trees. *Mol Biol Evol*. **4**(4):406-425.
- 800 96. **Bailey TL , et al.** 2009. MEME SUITE: tools for motif discovery and searching. *Nucleic Acids Res*.  
801 **37**(Web Server issue):W202-208.
- 802 97. **Crooks GE, Hon G, Chandonia JM, Brenner SE.** 2004. WebLogo: a sequence logo generator.  
803 *Genome Res*. **14**(6):1188-1190.
- 804 98. **Abrahao J , et al.** 2018. Tailed giant Tupanvirus possesses the most complete translational apparatus of  
805 the known virosphere. *Nat Commun*. **9**(1):749.
- 806 99. **Wolf YI, Makarova KS, Lobkovsky AE, Koonin EV.** 2016. Two fundamentally different classes of  
807 microbial genes. *Nat Microbiol*. **2**:16208.
- 808 100. **Medini D, Donati C, Tettelin H, Masignani V, Rappuoli R.** 2005. The microbial pan-genome. *Curr*  
809 *Opin Genet Dev*. **15**(6):589-594.
- 810 101. **Tettelin H, Riley D, Cattuto C, Medini D.** 2008. Comparative genomics: the bacterial pan-genome.  
811 *Curr Opin Microbiol*. **11**(5):472-477.
- 812 102. **Vernikos G, Medini D, Riley DR, Tettelin H.** 2015. Ten years of pan-genome analyses. *Curr Opin*  
813 *Microbiol*. **23**:148-154.
- 814 103. **Puigbo P, Lobkovsky AE, Kristensen DM, Wolf YI, Koonin EV.** 2014. Genomes in turmoil:  
815 quantification of genome dynamics in prokaryote supergenomes. *BMC Biol*. **12**:66.
- 816 104. **Aherfi S , et al.** 2018. A Large Open Pangenome and a Small Core Genome for Giant Pandoraviruses.  
817 *Front Microbiol*. **9**:1486.
- 818 105. **La Scola B , et al.** 2008. The virophage as a unique parasite of the giant mimivirus. *Nature*.  
819 **455**(7209):100-104.
- 820 106. **Fischer MG, Suttle CA.** 2011. A virophage at the origin of large DNA transposons. *Science*.  
821 **332**(6026):231-234.
- 822 107. **Zhou J , et al.** 2015. Three novel virophage genomes discovered from Yellowstone Lake metagenomes.  
823 *J Virol*. **89**(2):1278-1285.

- 824 108. **Oh S, Yoo D, Liu WT.** 2016. Metagenomics Reveals a Novel Virophage Population in a Tibetan  
825 Mountain Lake. *Microbes Environ.* **31**(2):173-177.
- 826 109. **Yutin N, Kapitonov VV, Koonin EV.** 2015. A new family of hybrid virophages from an animal gut  
827 metagenome. *Biol Direct.* **10**:19.
- 828 110. **Yutin N, Raoult D, Koonin EV.** 2013. Virophages, polintons, and transpovirons: a complex  
829 evolutionary network of diverse selfish genetic elements with different reproduction strategies. *Viol J.*  
830 **10**:158.
- 831 111. **Krupovic M, Kuhn JH, Fischer MG.** 2016. A classification system for virophages and satellite  
832 viruses. *Arch Virol.* **161**(1):233-247.
- 833 112. **Iyer LM, Abhiman S, Aravind L.** 2008. A new family of polymerases related to superfamily A DNA  
834 polymerases and T7-like DNA-dependent RNA polymerases. *Biol Direct.* **3**:39.
- 835 113. **Oliveira GP , et al.** 2017. Promoter Motifs in NCLDV: An Evolutionary Perspective. *Viruses.* **9**(1).
- 836 114. **Legendre M , et al.** 2010. mRNA deep sequencing reveals 75 new genes and a complex transcriptional  
837 landscape in Mimivirus. *Genome Res.* **20**(5):664-674.
- 838 115. **Simmonds P.** 2015. Methods for virus classification and the challenge of incorporating metagenomic  
839 sequence data. *J Gen Virol.* **96**(Pt 6):1193-1206.
- 840 116. **Shi M , et al.** 2016. Redefining the invertebrate RNA virosphere. *Nature.*
- 841 117. **Shi M , et al.** 2018. The evolutionary history of vertebrate RNA viruses. *Nature.* **556**(7700):197-202.
- 842 118. **Shi M, Zhang YZ, Holmes EC.** 2018. Meta-transcriptomics and the evolutionary biology of RNA  
843 viruses. *Virus Res.* **243**:83-90.
- 844 119. **Dolja VV, Koonin EV.** 2018. Metagenomics reshapes the concepts of RNA virus evolution by  
845 revealing extensive horizontal virus transfer. *Virus Res.* **244**:36-52.
- 846 120. **Yutin N , et al.** 2018. Discovery of an expansive bacteriophage family that includes the most abundant  
847 viruses from the human gut. *Nat Microbiol.* **3**(1):38-46.
- 848 121. **Yutin N, Backstrom D, Ettema TJG, Krupovic M, Koonin EV.** 2018. Vast diversity of prokaryotic  
849 virus genomes encoding double jelly-roll major capsid proteins uncovered by genomic and metagenomic  
850 sequence analysis. *Viol J.* **15**(1):67.
- 851 122. **Rodrigues RAL, Abrahao JS, Drumond BP, Kroon EG.** 2016. Giants among larges: how gigantism  
852 impacts giant virus entry into amoebae. *Curr Opin Microbiol.* **31**:88-93.
- 853 123. **Koonin EV, Yutin N.** 2018. Evolution of the Large Nucleocytoplasmic DNA Viruses of eukaryotes and  
854 convergent origins of viral gigantism. *Advances Virus Research.* **in press.**
- 855 124. **Edwards RA, McNair K, Faust K, Raes J, Dutilh BE.** 2016. Computational approaches to predict  
856 bacteriophage-host relationships. *FEMS Microbiol Rev.* **40**(2):258-272.
- 857 125. **Coutinho FH , et al.** 2017. Marine viruses discovered via metagenomics shed light on viral strategies  
858 throughout the oceans. *Nat Commun.* **8**:15955.

- 859 126. **Bauch HA , et al.** 2001. A multiproxy reconstruction of the evolution of deep and surface waters in the  
860 subarctic Nordic seas over the last 30,000 yr. *Quaternary Science Reviews*. **20**(4):659-678.
- 861 127. **Hafliason H, De Alvaro MM, Nygard A, Sejrup H, P., Laberg JS.** 2007. Holocene sedimentary  
862 processes in the Andøya Canyon system, north Norway. *Marine Geology*. **246**(2-4):86-104.
- 863 128. **Roux S , et al.** 2017. Ecogenomics of virophages and their giant virus hosts assessed through time series  
864 metagenomics. *Nat Commun*. **8**(1):858.
- 865
- 866

867 **Figure legends**

868  
869  
870  
871 **Figure 1. Diversity of the NCLDV DNAP sequences in the Loki's Castle sediment metagenomes**  
872 **(orange), and the TARA oceans (turquoise), and EarthVirome (purple) databases.** Reference sequences  
873 are shown in black. The binned NCLDV genomes are marked with a star. Branches with bootstrap values above  
874 95 are marked with a black circle. The maximum likelihood phylogeny was constructed as described under  
875 Methods.

876  
877 **Figure 2. Flowchart of the metagenomic binning procedures.** Two main binning approaches were used:  
878 differential coverage binning (DC), and co-assembly binning (CA). DC: Reads from four different samples  
879 were assembled into four metagenomes. The metagenomes were screened for NCLDV DNAP, and contigs were  
880 binned with CONCOCT and ESOM. The raw CONCOCT and ESOM bins were combined and refined using  
881 Mmggenome. The refined bins were put through taxonomic filtering, keeping only the contigs encoding at least  
882 one NCLDV gene, and finally, reassembled. CA: A database containing the refined DC bins and NCLDV  
883 reference genomes was used to create profiles to extract reads from the metagenomes. The reads were combined  
884 and co-assembled. This step was followed by CONCOCT binning, Mmggenome bin refinement and taxonomic  
885 filtering. Finally, the DC bins and CA bins were annotated and the best bins were chosen by comparing  
886 sequence statistics, completeness and redundancy of marker genes, and marker gene phylogenies (see  
887 Additional File 1 for details).

888  
889 **Figure 3. Phylogenetic tree of three concatenated, universally conserved NCLDV proteins: DNA**  
890 **polymerase, major capsid protein, and A18-like helicase.** Support values were obtained using 100 bootstrap  
891 replications; branches with support less than 50% were collapsed. Scale bars represent the number of amino

892 acid (aa) substitutions per site. The inset shows the *Mimiviridae* branch. Triangles show collapsed branches.  
893 The LCV sequences are color-coded as follows: red, Pitho-like; green, Marseille-like (a deep branch shown in  
894 dark green); orange, Irido-like; blue, Mimi (Klosneu)-like.

895  
896 **Figure 4. Phylogenies of selected translation system components encoded by Loki's Castle viruses.**

897 A, translation initiation factor eIF2b

898 B, aspartyl/asparaginyl-tRNA synthetase, AsnS

899 C, tyrosyl-tRNA synthetase, TyrS,

900 D, methionyl-tRNA synthetase, MetS. All branches are color-coded according to taxonomic affinity (see

901 Additional File 3 for the full trees). The numbers at the internal branches indicate local likelihood-based support  
902 (percentage points).

903  
904 **Figure 5. Shared and unique genes in four NCLDV families that include Loki's Castle viruses.** The  
905 numbers correspond to NCLDV clusters that contain at least one protein from Mimi-, Marseille-, Pitho, and -  
906 Iridoviridae, but are absent from other NCLDV families.

907  
908 **Figure 6. Gene presence-absence tree of the NCLDV including the Loki's Castle viruses.** The Neighbor-  
909 Joining dendrogram was reconstructed from the matrix of pairwise distances calculated from binary phyletic  
910 patterns of the NCLDV clusters. The numbers at internal branches indicate bootstrap support (percentage  
911 points); numbers below 50% are not shown.

912  
913 **Figure 7. Phylogenies of selected repair and nucleotide metabolism genes of the Pitho-Irido-Marseille**  
914 **virus group including Loki's Castle viruses.**

915 A, SbcCD nuclease, ATPase subunit SbcC

916 B, SbcCD nuclease, nuclease subunit SbcD  
917 C, exonuclease V;  
918 D, dNMP kinase.

919 The numbers at the internal branches indicate local likelihood-based support (percentage points). Genbank  
920 protein IDs, wherever available, are shown after '@'. Taxa abbreviations are as follows: A DP, Archaea;  
921 DPANN group; A TA, Thaumarchaeota; A Ea, Euryarchaeota; B FC, Bacteroidetes; B Fu, Fusobacteria; B Pr,  
922 Proteobacteria; B Te, Firmicutes; B un, unclassified Bacteria; E Op, Opisthokonta; N Pi, "Pithoviridae"; N Ac,  
923 Ascoviridae; N As, Asfarviridae; N Ma, Marseilleviridae; N Mi, Mimiviridae; N Pa, Pandoraviridae; N Ph,  
924 Phycodnaviridae; V ds, double-strand DNA viruses.

925

926 **Figure 8. Loki's Castle virophages.**

927 A, Phylogenetic tree of virophage major capsid proteins. Reference virophages from GenBank are marked with  
928 black font (the three prototype virophages are shown in bold), environmental virophages shown in blue (128)  
929 and green (wgs portion of GenBank).

930 B, Genome maps of Loki's Castle virophages compared with Sputnik virophage. Green and blue triangles mark  
931 direct and inverted repeats. Pentagons with a thick outline represent conserved virophage genes.

932



933 **Additional files**

934 Additional File 1 – Supplementary binning methods and figures

935 Additional File 2 – LCV and LC virophage protein annotation

936 Additional File 3 – DNAP, MCP, A18hel, and translation protein trees

937 Additional File 4. – virophage genome maps

938 Additional File 5. – taxonomic breakdown of psi-BLAST hits retrieved with profiles created from selected  
939 PIM clusters (clusters of four or more proteins, less conserved NCLDV genes).

940 Additional File 6. – Repeats plots

941 Additional File 7. – Conserved promoter-like motif frequencies in selected LCV bins

942 Additional File 8. – Conserved promoter-like motifs in the LCMiAC01 and LCMiAC02 bins, and LCV  
943 virophages

944 Additonal File 9. - Conserved promoter-like motifs in pitho-like LCV.

945 Additonal File 10. - Conserved promoter-like motifs in Marseille-like and irido-like LCV.

946  
947  
948 More supplementary material:

949 [ftp://ftp.ncbi.nih.gov/pub/yutinn/Loki\\_Castle\\_NCLDV\\_2018/](ftp://ftp.ncbi.nih.gov/pub/yutinn/Loki_Castle_NCLDV_2018/)

950  
951  
952  
953  
954  
955  
956  
957  
958  
959  
960

961  
962  
963  
964  
965  
966  
967  
968  
969  
970  
971  
972  
973  
974  
975  
976  
977  
978  
979  
980  
981  
982

**Table 1. The 23 NCLDV bins from Loki's Castle.**

| bin/virus                            |                 | # of contigs | min contig length, nt | max contig length, nt | total contig length, nt | # of predicted proteins | MCP <sup>a</sup> | DNAP | ATP | RNAP <sup>A</sup> | RNAP <sup>B</sup> | D5hel | A18hel | VLTF3 | VLTF2 | RNAP5 | Erv1 | RNAlig | TopoII | FLAP | TFIIB |   |   |
|--------------------------------------|-----------------|--------------|-----------------------|-----------------------|-------------------------|-------------------------|------------------|------|-----|-------------------|-------------------|-------|--------|-------|-------|-------|------|--------|--------|------|-------|---|---|
| LCPAC001                             | Pitho-like      | 12           | 8088                  | 60499                 | 249064                  | 227                     | 1                | 1    | 0   | 1                 | 1                 | 0     | 1      | 0     | 0     | 0     | 2    | 1      | 1      | 0    | 0     |   |   |
| LCPAC101                             | Pitho-like      | 26           | 6043                  | 46492                 | 466072                  | 373                     | 1                | 1    | 0   | 1                 | 1                 | 1     | 1      | 0     | 1     | 1     | 0    | 1      | 1      | 1    | 1     |   |   |
| LCPAC102                             | Pitho-like      | 12           | 6510                  | 44810                 | 285593                  | 229                     | 1                | 1    | 0   | 1                 | 1                 | 0     | 0      | 0     | 1     | 0     | 3    | 1      | 0      | 1    | 1     |   |   |
| LCPAC103                             | Pitho-like      | 17           | 5380                  | 23680                 | 204602                  | 186                     | 1                | 1    | 0   | 1                 | 1                 | 1     | 1      | 1     | 1     | 1     | 0    | 1      | 1      | 0    | 1     |   |   |
| LCPAC104                             | Pitho-like      | 4            | 6208                  | 129049                | 218903                  | 194                     | 1                | 1    | 0   | 1                 | 1                 | 1     | 1      | 1     | 1     | 1     | 1    | 1      | 1      | 1    | 1     |   |   |
| LCPAC201                             | Pitho-like      | 11           | 5186                  | 168698                | 428611                  | 327                     | 1                | 1    | 0   | 1                 | 2                 | 1     | 1      | 1     | 1     | 1     | 1    | 1      | 1      | 1    | 1     |   |   |
| LCPAC202                             | Pitho-like      | 26           | 5141                  | 72684                 | 443964                  | 354                     | 1                | 2    | 0   | 1                 | 2                 | 1     | 1      | 1     | 1     | 1     | 1    | 1      | 1      | 0    | 1     |   |   |
| LCPAC302                             | Pitho-like      | 30           | 5274                  | 20428                 | 290561                  | 294                     | 0                | 1    | 0   | 1                 | 1                 | 0     | 0      | 1     | 1     | 1     | 1    | 0      | 1      | 0    | 0     |   |   |
| LCPAC304                             | Pitho-like      | 12           | 11737                 | 173767                | 638759                  | 688                     | 1                | 1    | 0   | 1                 | 1                 | 1     | 1      | 1     | 1     | 1     | 0    | 1      | 1      | 1    | 1     |   |   |
| LCPAC401                             | Pitho-like      | 11           | 7155                  | 114453                | 484752                  | 504                     | 1                | 1    | 0   | 1                 | 1                 | 1     | 1      | 1     | 1     | 2     | 1    | 0      | 1      | 1    | 1     |   |   |
| LCPAC403                             | Pitho-like      | 6            | 24087                 | 117884                | 420388                  | 430                     | 1                | 1    | 0   | 1                 | 1                 | 1     | 1      | 1     | 1     | 2     | 0    | 1      | 1      | 1    | 1     |   |   |
| LCPAC404                             | Pitho-like      | 10           | 11211                 | 84762                 | 436585                  | 390                     | 1                | 1    | 0   | 1                 | 1                 | 1     | 1      | 1     | 1     | 2     | 0    | 1      | 1      | 1    | 1     |   |   |
| LCPAC406                             | Pitho-like      | 10           | 11113                 | 75955                 | 384297                  | 401                     | 1                | 1    | 0   | 1                 | 1                 | 1     | 1      | 1     | 1     | 2     | 1    | 0      | 1      | 1    | 1     |   |   |
| LCDPAC01                             | Pitho-like      | 21           | 5383                  | 31931                 | 282320                  | 282                     | 1                | 1    | 0   | 1                 | 1                 | 1     | 1      | 1     | 1     | 0     | 1    | 0      | 1      | 1    | 0     |   |   |
| LCDPAC02                             | Pitho-like      | 9            | 6786                  | 90916                 | 367310                  | 390                     | 1                | 1    | 0   | 1                 | 1                 | 1     | 1      | 0     | 0     | 1     | 1    | 0      | 1      | 0    | 0     |   |   |
| LCMAC101                             | Marseille-like  | 7            | 15190                 | 393561                | 763048                  | 793                     | 1                | 1    | 1   | 1                 | 1                 | 1     | 1      | 1     | 1     | 1     | 1    | 1      | 1      | 1    | 1     |   |   |
| LCMAC102                             | Marseille-like  | 1            | 395459                | 395459                | 395459                  | 465                     | 1                | 1    | 1   | 1                 | 1                 | 1     | 1      | 1     | 1     | 1     | 1    | 1      | 1      | 1    | 1     |   |   |
| LCMAC103                             | Marseille-like  | 9            | 14346                 | 69824                 | 389984                  | 427                     | 1                | 1    | 1   | 1                 | 1                 | 1     | 1      | 1     | 0     | 1     | 0    | 1      | 1      | 1    | 0     |   |   |
| LCMAC201                             | Marseille-like  | 25           | 6728                  | 57873                 | 565697                  | 566                     | 1                | 1    | 1   | 1                 | 1                 | 0     | 1      | 1     | 0     | 1     | 2    | 1      | 1      | 1    | 1     |   |   |
| LCMAC202                             | Marseille-like  | 19           | 6906                  | 153726                | 705352                  | 672                     | 1                | 1    | 2   | 1                 | 1                 | 1     | 1      | 1     | 0     | 1     | 2    | 1      | 1      | 1    | 1     |   |   |
| LCIVAC01                             | Iridovirus-like | 19           | 5375                  | 17223                 | 198495                  | 222                     | 0                | 1    | 0   | 1                 | 1                 | 1     | 1      | 0     | 1     | 0     | 1    | 1      | 1      | 0    | 1     |   |   |
| LCMiAC01                             | Mimivirus-like  | 18           | 8458                  | 85120                 | 672112                  | 571                     | 6                | 1    | 1   | 1                 | 1                 | 1     | 1      | 1     | 1     | 1     | 1    | 1      | 1      | 1    | 0     |   |   |
| LCMiAC02                             | Mimivirus-like  | 21           | 8237                  | 131456                | 642939                  | 583                     | 6                | 1    | 2   | 1                 | 1                 | 2     | 1      | 2     | 1     | 1     | 1    | 1      | 1      | 1    | 1     |   |   |
| Cedratvirus A11                      |                 |              |                       |                       | 589068                  | 574                     | 1                | 1    | 0   | 1                 | 1                 | 1     | 1      | 1     | 1     | 1     | 1    | 1      | 1      | 1    | 1     | 1 |   |
| Orpheovirus IHUMI LCC2               |                 |              |                       |                       | 1473573                 | 1199                    | 1                | 1    | 0   | 1                 | 1                 | 1     | 1      | 1     | 1     | 1     | 1    | 1      | 1      | 1    | 1     | 1 | 1 |
| Pithovirus sibericum                 |                 |              |                       |                       | 610033                  | 425                     | 1                | 1    | 0   | 1                 | 1                 | 1     | 1      | 1     | 1     | 1     | 1    | 1      | 1      | 1    | 1     | 1 | 1 |
| Marseillevirus                       |                 |              |                       |                       | 369360                  | 403                     | 1                | 1    | 1   | 1                 | 1                 | 1     | 1      | 1     | 1     | 1     | 1    | 1      | 1      | 1    | 1     | 1 | 1 |
| Diadromus pulchellus ascovirus 4a    |                 |              |                       |                       | 119343                  | 119                     | 1                | 1    | 1   | 1                 | 1                 | 1     | 0      | 1     | 1     | 1     | 1    | 1      | 1      | 0    | 0     | 1 | 1 |
| Heliiothis virescens ascovirus 3e    |                 |              |                       |                       | 186262                  | 180                     | 1                | 1    | 1   | 1                 | 1                 | 1     | 0      | 1     | 1     | 1     | 1    | 1      | 1      | 0    | 1     | 1 | 1 |
| Lymphocystis disease virus           |                 |              |                       |                       | 186250                  | 239                     | 1                | 1    | 1   | 1                 | 1                 | 1     | 1      | 1     | 1     | 1     | 1    | 1      | 1      | 0    | 1     | 0 | 0 |
| Frog virus 3                         |                 |              |                       |                       | 105903                  | 99                      | 1                | 1    | 1   | 1                 | 1                 | 1     | 0      | 1     | 1     | 1     | 1    | 1      | 1      | 0    | 1     | 0 | 0 |
| Wiseana iridescent virus             |                 |              |                       |                       | 205791                  | 193                     | 1                | 1    | 1   | 1                 | 1                 | 1     | 1      | 1     | 1     | 1     | 1    | 1      | 1      | 1    | 1     | 1 | 1 |
| Cafeteria roenbergensis virus BV PW1 |                 |              |                       |                       | 617453                  | 544                     | 3                | 1    | 1   | 1                 | 1                 | 1     | 1      | 1     | 0     | 1     | 1    | 0      | 1      | 1    | 1     | 1 | 1 |
| Acanthamoeba polyphaga mimivirus     |                 |              |                       |                       | 1181549                 | 979                     | 4                | 1    | 2   | 1                 | 1                 | 1     | 1      | 1     | 1     | 1     | 1    | 0      | 1      | 1    | 1     | 1 | 1 |
| Klosneuvirus KNV1                    |                 |              |                       |                       | 1573084                 | 1545                    | 7                | 1    | 3   | 1                 | 1                 | 2     | 1      | 1     | 1     | 1     | 1    | 3      | 2      | 1    | 2     | 1 | 1 |

Data on representative complete NCLDV genomes from the relevant families are included for comparison.

<sup>a)</sup> MCP, NCLDV major capsid protein (NCVOG0022); DNAP, DNA polymerase family B, elongation subunit (NCVOG0038); ATP, A32-like packaging ATPase (NCVOG0249); RNAP $\alpha$ , DNA-directed RNA polymerase subunit alpha (NCVOG0274); RNAP $\beta$ , DNA-directed RNA polymerase subunit beta (NCVOG0271); D5hel, D5-like helicase-primase (NCVOG0023); A18hel, A18-like helicase (NCVOG0076); VLTF3, Poxvirus Late Transcription Factor VLTF3 (NCVOG0262); VLTF2, A1L transcription factor/late TF VLTF-2 (NCVOG1164); RNAP5, DNA-directed RNA polymerase subunit 5 (NCVOG0273); Erv1, Erv1/Alr family disulfide (thiol) oxidoreductase (NCVOG0052); RNAlig, RNA ligase (NCVOG1088); TopoII, DNA topoisomerase II (NCVOG0037); FLAP, Flap endonuclease (NCVOG1060); TFIIB, transcription initiation factor IIB (NCVOG1127).

**Table 2. Translation-related proteins and tRNAs in Loki's Castle NCLDV**

| bin name                      | AlaS | AsnS | AsnS | GlnS | HisS | IleS | MetS | ProS | Pth2 | RLI1 | ThrS | TrpS | TyrS | eIF1 | eIF1a | eIF2a | eIF2b | eIF2g | eIF4e | eIF5b | eRF1 | tRNA |    |
|-------------------------------|------|------|------|------|------|------|------|------|------|------|------|------|------|------|-------|-------|-------|-------|-------|-------|------|------|----|
| LCPAC001                      |      | 1    |      |      |      |      | 1    |      |      |      |      |      |      |      |       |       |       |       |       |       |      |      | 5  |
| LCPAC101                      |      |      | 1    |      |      |      |      |      |      |      |      |      |      |      |       |       |       |       |       |       |      |      | 2  |
| LCPAC102                      |      |      |      |      |      |      |      |      |      |      |      |      |      |      |       |       |       |       |       |       |      |      | 3  |
| LCPAC103                      |      |      |      |      |      |      |      |      |      |      |      |      |      |      |       |       |       |       |       |       |      |      |    |
| LCPAC104                      |      |      |      |      |      |      |      |      |      |      |      |      |      |      |       |       |       |       |       |       |      |      | 4  |
| LCPAC201                      |      |      |      |      |      |      |      |      |      |      |      |      |      |      |       |       |       |       |       |       |      |      |    |
| LCPAC202                      |      |      |      |      |      |      |      |      |      |      |      |      |      |      |       |       |       |       |       |       |      |      |    |
| LCPAC302                      |      |      |      |      |      |      |      |      |      | 1    |      |      |      |      |       |       |       |       |       |       |      |      |    |
| LCPAC304                      |      | 1    |      |      |      |      |      |      | 1    | 1    |      | 1    |      |      |       |       | 1     |       |       |       |      |      | 21 |
| LCPAC401                      |      |      |      |      |      |      |      |      |      |      |      |      |      |      |       |       |       |       |       |       |      |      |    |
| LCPAC403                      |      |      |      |      |      |      |      |      |      |      |      |      |      |      |       |       |       |       |       |       |      |      |    |
| LCPAC404                      |      |      |      |      |      |      |      |      |      |      |      |      |      |      |       |       | 1     |       |       |       |      |      |    |
| LCPAC406                      |      |      |      |      |      |      |      |      |      |      |      |      |      |      |       |       |       |       |       |       |      |      |    |
| LCDPAC01                      |      |      |      |      |      |      |      |      |      |      |      |      |      |      |       |       |       |       |       |       |      |      |    |
| LCDPAC02                      |      |      |      |      |      |      |      |      |      |      |      |      |      |      |       |       |       |       |       |       |      |      |    |
| LCMAC101                      |      | 3    |      |      |      |      |      |      | 1    |      |      |      |      |      |       |       |       |       |       |       |      |      | 8  |
| LCMAC102                      |      |      |      |      |      |      |      |      |      |      |      |      |      |      |       |       |       |       |       |       |      |      | 3  |
| LCMAC103                      | 1    |      |      |      |      |      |      |      |      |      |      |      |      |      |       | 1     | 1     | 1     | 1     | 1     | 1    | 1    | 17 |
| LCMAC201                      |      | 1    |      | 1    |      |      | 1    |      |      |      |      |      | 1    |      |       | 1     | 2     | 1     |       |       |      |      | 11 |
| LCMAC202                      | 1    | 2    |      |      |      |      |      | 1    |      |      | 1    |      | 1    | 1    |       | 1     | 2     | 1     |       |       |      | 1    | 26 |
| LCIVAC01                      |      |      |      |      |      |      |      |      |      |      |      |      |      |      |       |       |       |       |       |       |      |      |    |
| LCMiAC01                      |      |      |      |      | 1    | 1    |      |      |      |      | 1    |      | 1    |      | 1     |       |       |       |       | 1     |      |      | 18 |
| LCMiAC02                      |      |      |      |      |      |      |      |      |      |      |      |      |      |      |       |       |       |       |       | 2     |      | 1    | 2  |
| <b>Pithovirus sibericum</b>   |      |      |      |      |      |      |      |      |      |      |      |      |      |      |       |       |       |       |       |       |      |      |    |
| <b>Cedratvirus_A11</b>        |      |      |      |      |      |      |      |      |      |      |      |      |      |      |       |       |       |       |       |       |      |      |    |
| <b>Orpheovirus</b>            |      | 1    | 1    |      | 1    | 1    |      |      |      |      |      |      | 1    | 1    |       |       |       |       |       |       |      | 1    |    |
| <b>Marseillevirus</b>         |      |      |      |      |      |      |      |      |      |      |      |      |      | 1    |       |       | 1     |       |       |       |      | 1    |    |
| <b>Klosneuvirus_KNV1</b>      | 1    | 1    | 1    | 2    | 1    | 1    | 1    | 1    | 3    | 1    | 1    | 1    | 1    | 1    | 1     | 1     | 2     | 1     | 1     |       | 1    | 1    | 25 |
| <b>mimivirus</b>              |      | 1    |      |      |      | 1    | 1    |      |      |      |      |      | 1    | 1    |       |       |       |       |       | 1     |      | 2    | 6  |
| <b>Tupanvirus</b>             | 1    | 1    | 1    | 2    | 1    | 1    | 1    | 1    |      |      | 1    | 1    | 1    | 1    | 1     | 1     | 2     | 1     | 2     |       | 1    | 1    |    |
| <b>C. roenbergensis virus</b> |      |      |      |      |      | 1    |      |      |      |      |      |      |      | 1    | 1     | 1     | 3     | 1     | 1     | 1     |      |      | 16 |

<sup>a</sup> translation-related proteins are abbreviated as follows: AlaS, Alanyl-tRNA synthetase; AsnS, Aspartyl/asparaginyl-tRNA synthetase; GlnS, Glutamyl- or glutaminyl-tRNA synthetase; GRS1, Glycyl-tRNA synthetase (class II) ; HisS, Histidyl-tRNA synthetase; IleS, Isoleucyl-tRNA synthetase; MetS, Methionyl-tRNA synthetase; ProS, Prolyl-tRNA synthetase; ThrS, Threonyl-tRNA synthetase; TrpS, Tryptophanyl-tRNA synthetase; TyrS, Tyrosyl-tRNA synthetase; Pth2, Peptidyl-tRNA hydrolase ; eIF1, Translation initiation factor 1 (eIF-1/SUI1); eIF1a, Translation initiation factor 1A/IF-1; eIF2a, Translation initiation factor 2, alpha subunit (eIF-2alpha) ; eIF2b, Translation initiation factor 2, beta subunit (eIF-2beta)/eIF-5 N-terminal domain ; eIF2g, Translation initiation factor 2, gamma subunit (eIF-2gamma; GTPase) ; eIF4e, Translation initiation factor 4E (eIF-4E); eIF5b, Translation initiation factor IF-2 (Initiation Factor 2 (IF2)/ eukaryotic Initiation Factor 5B (eIF5B) family; IF2/eIF5B); eRF1, Peptide chain release factor 1 (eRF1) ; RLI1, Translation initiation factor RLI1

Data for completely sequenced representatives of the relevant NCLDV families are included for comparison.

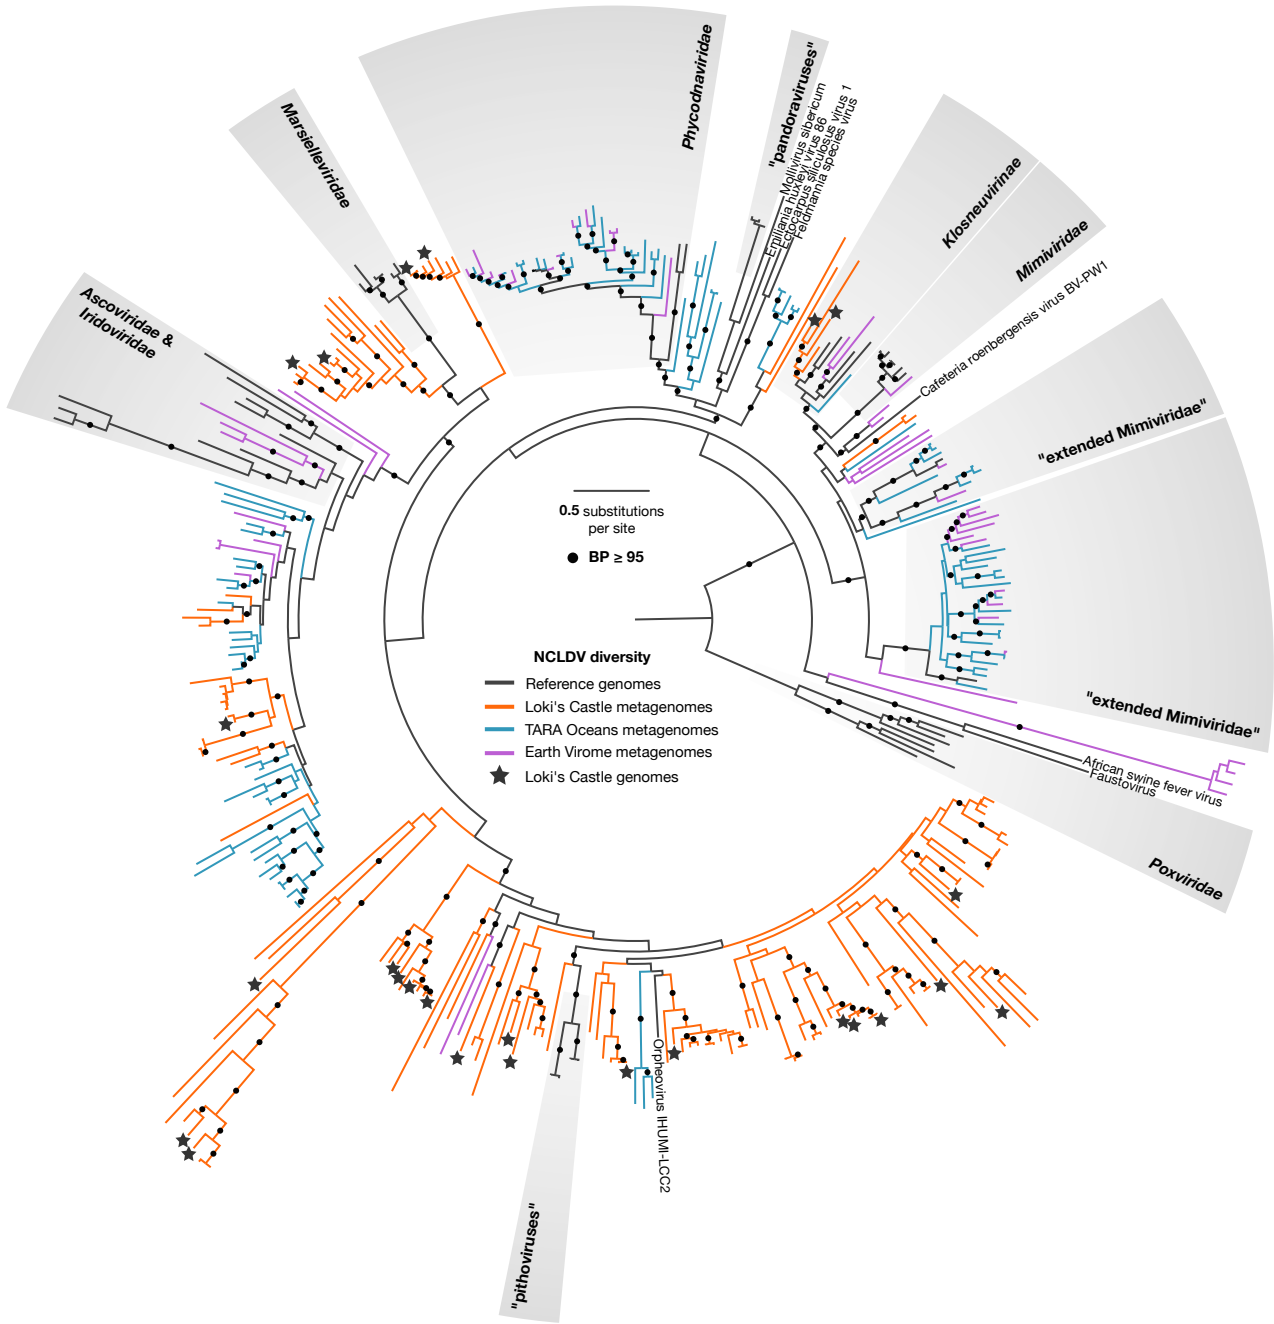

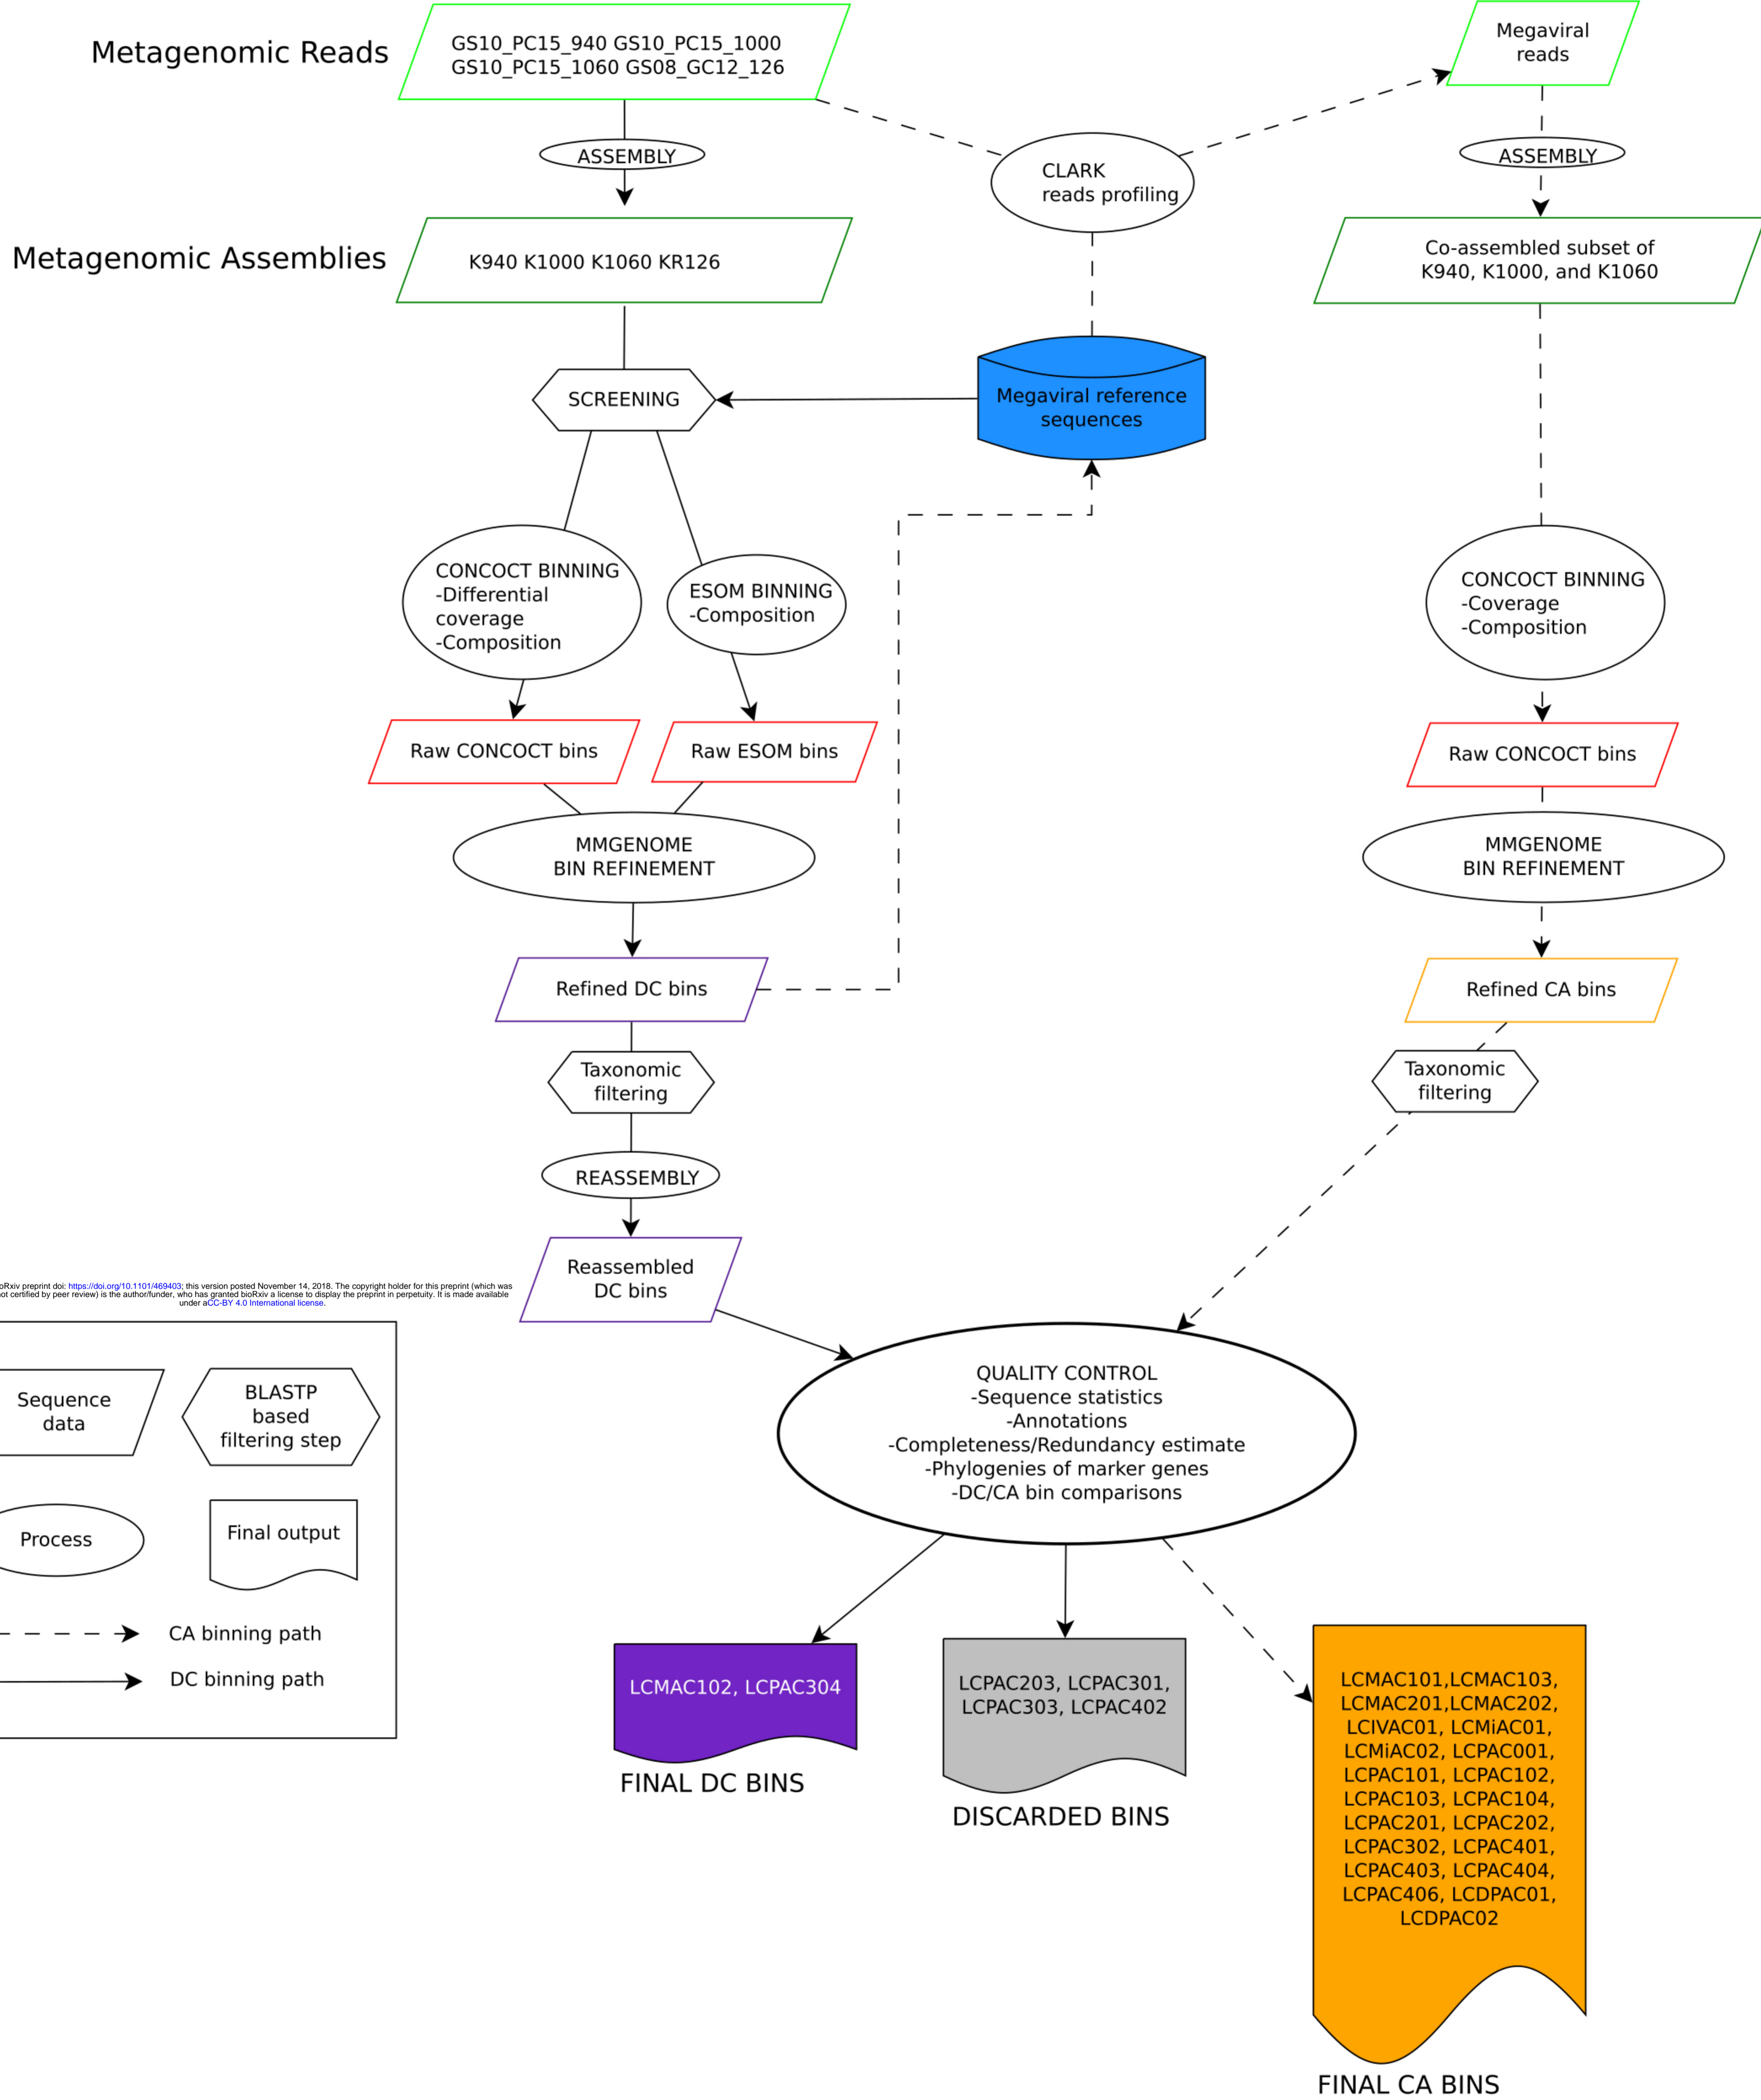

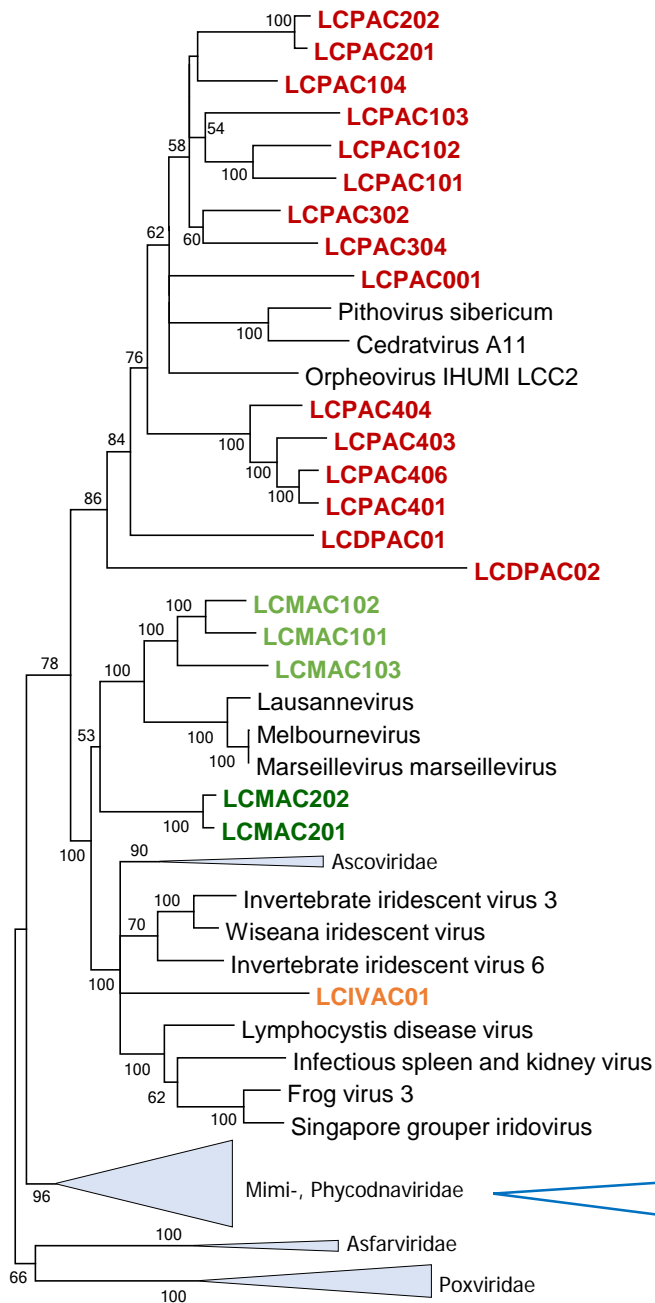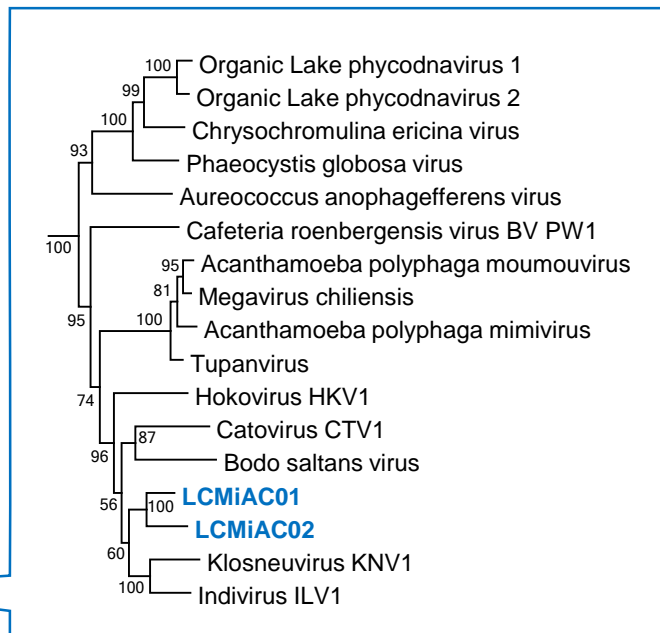



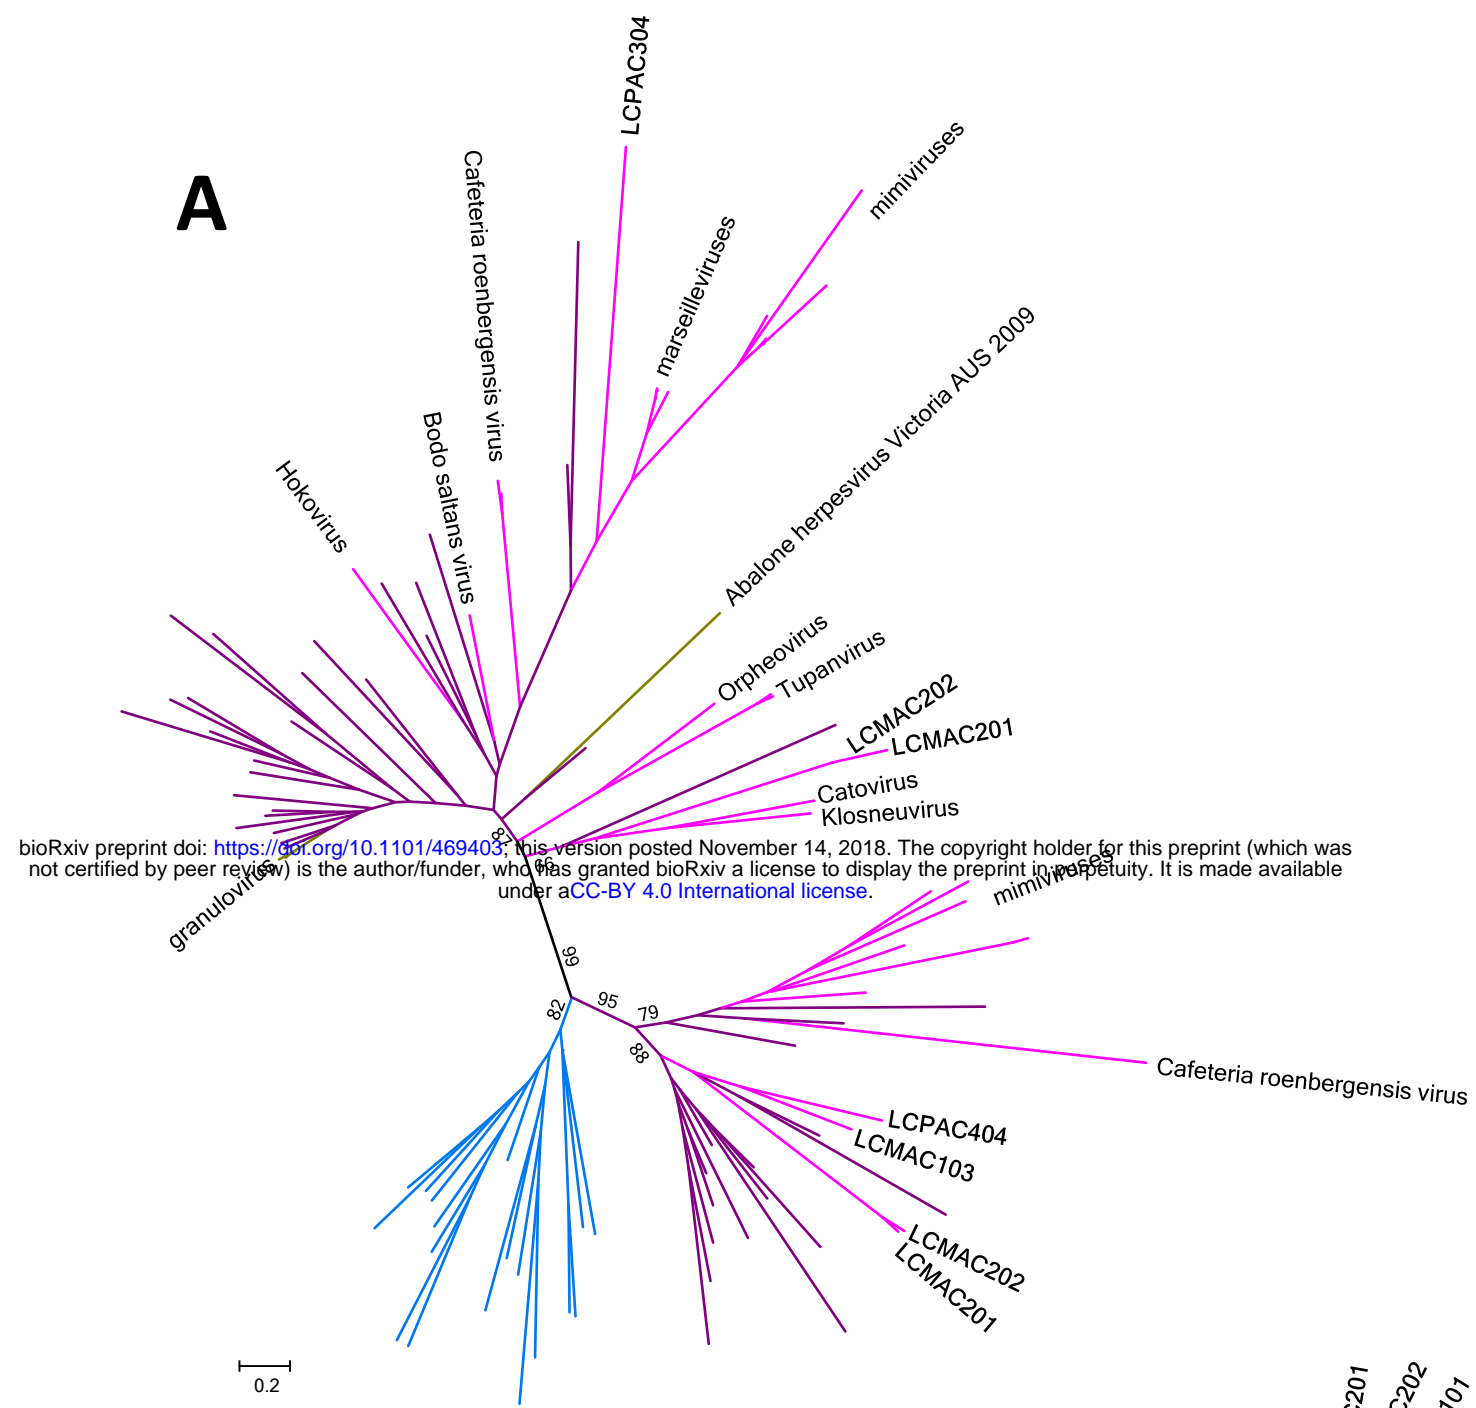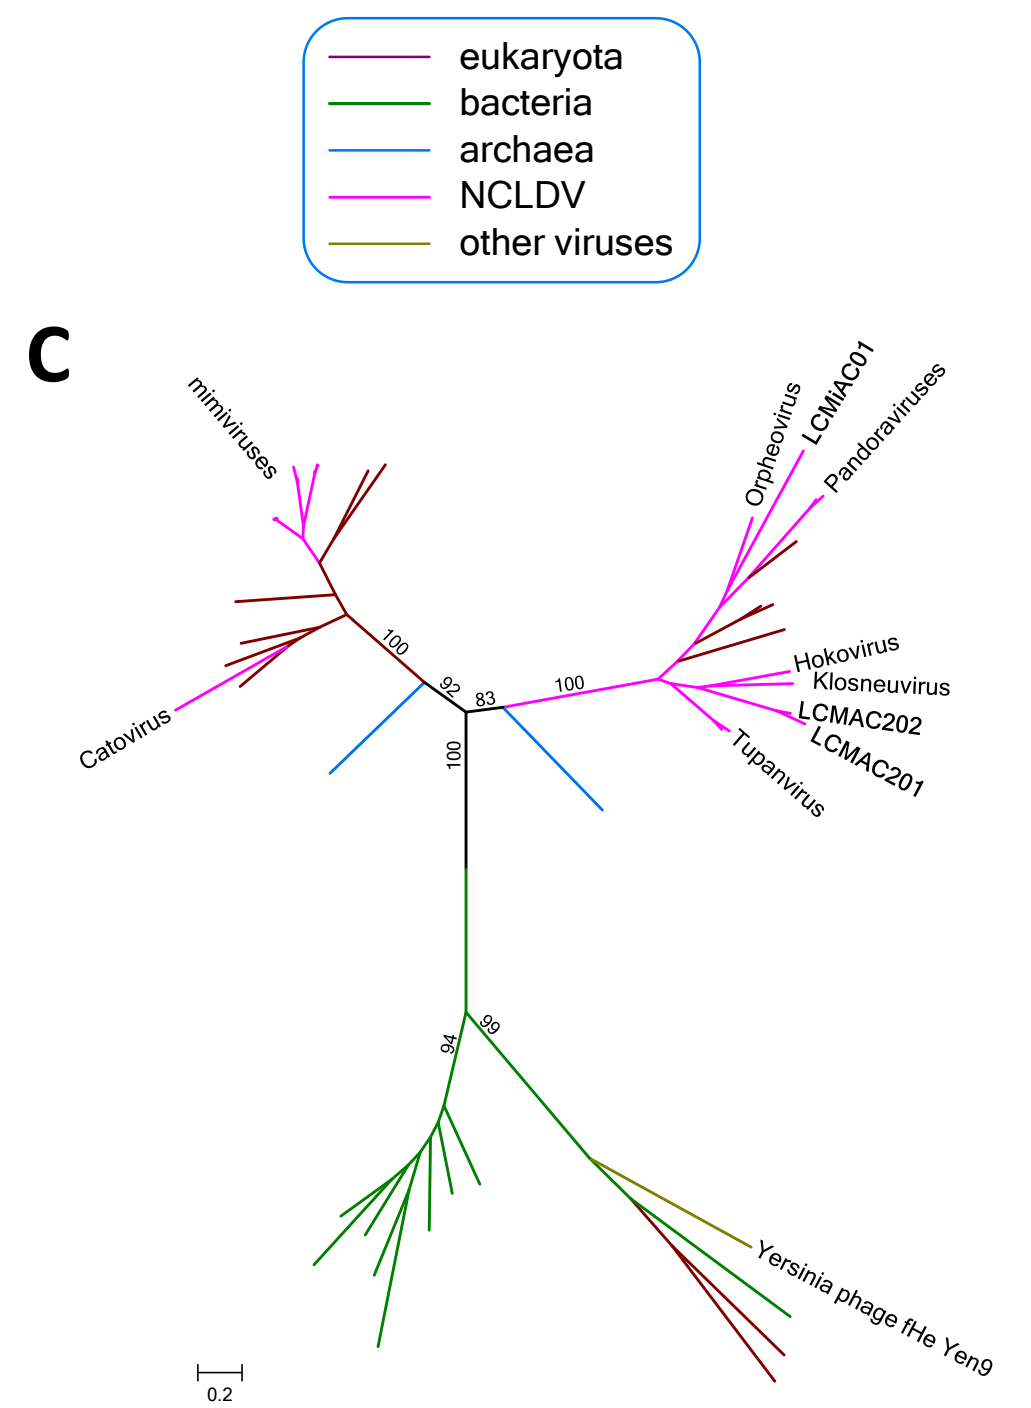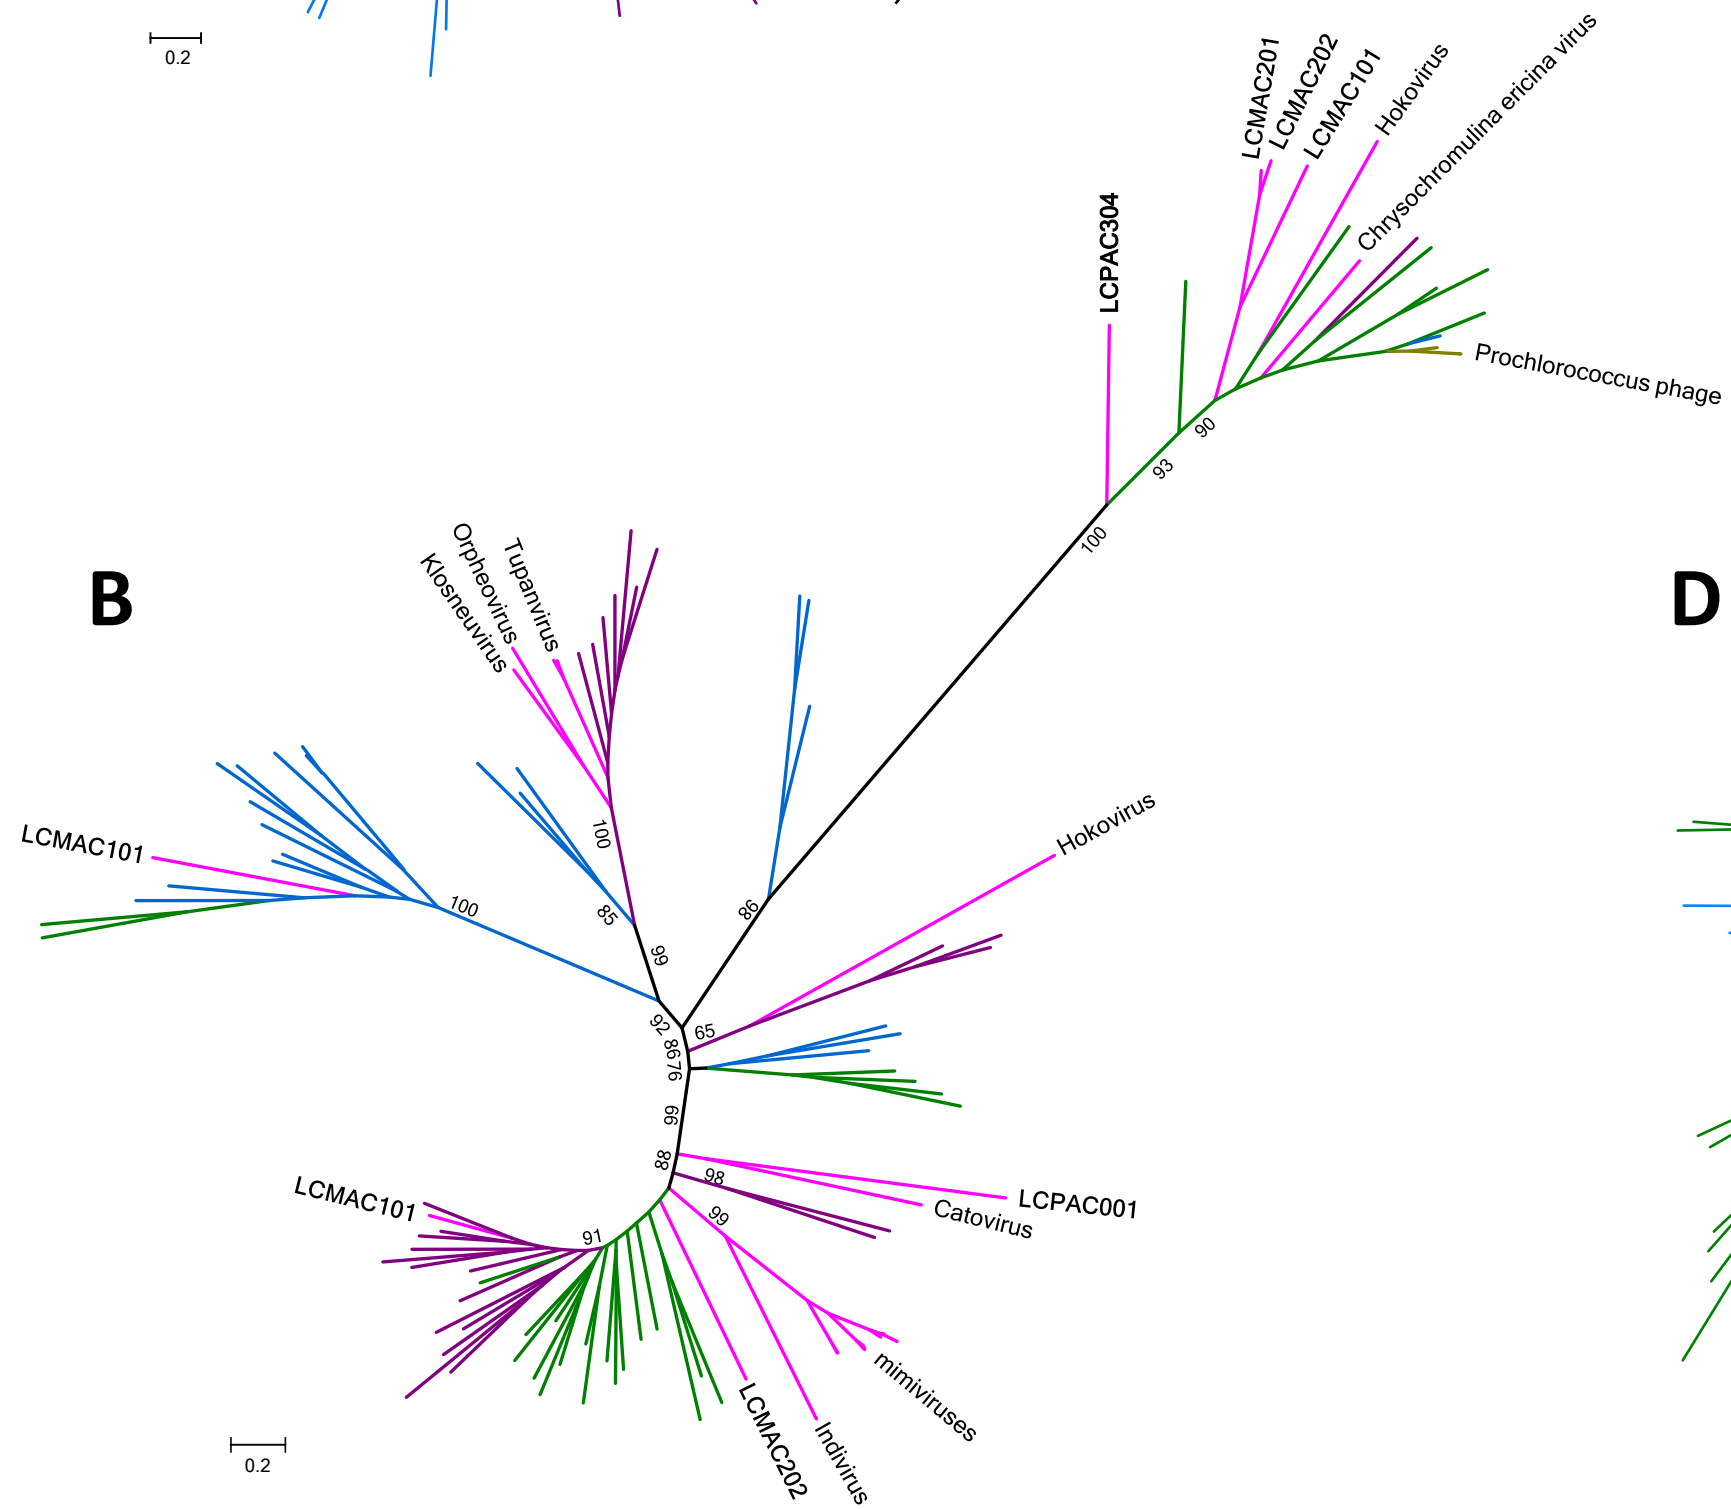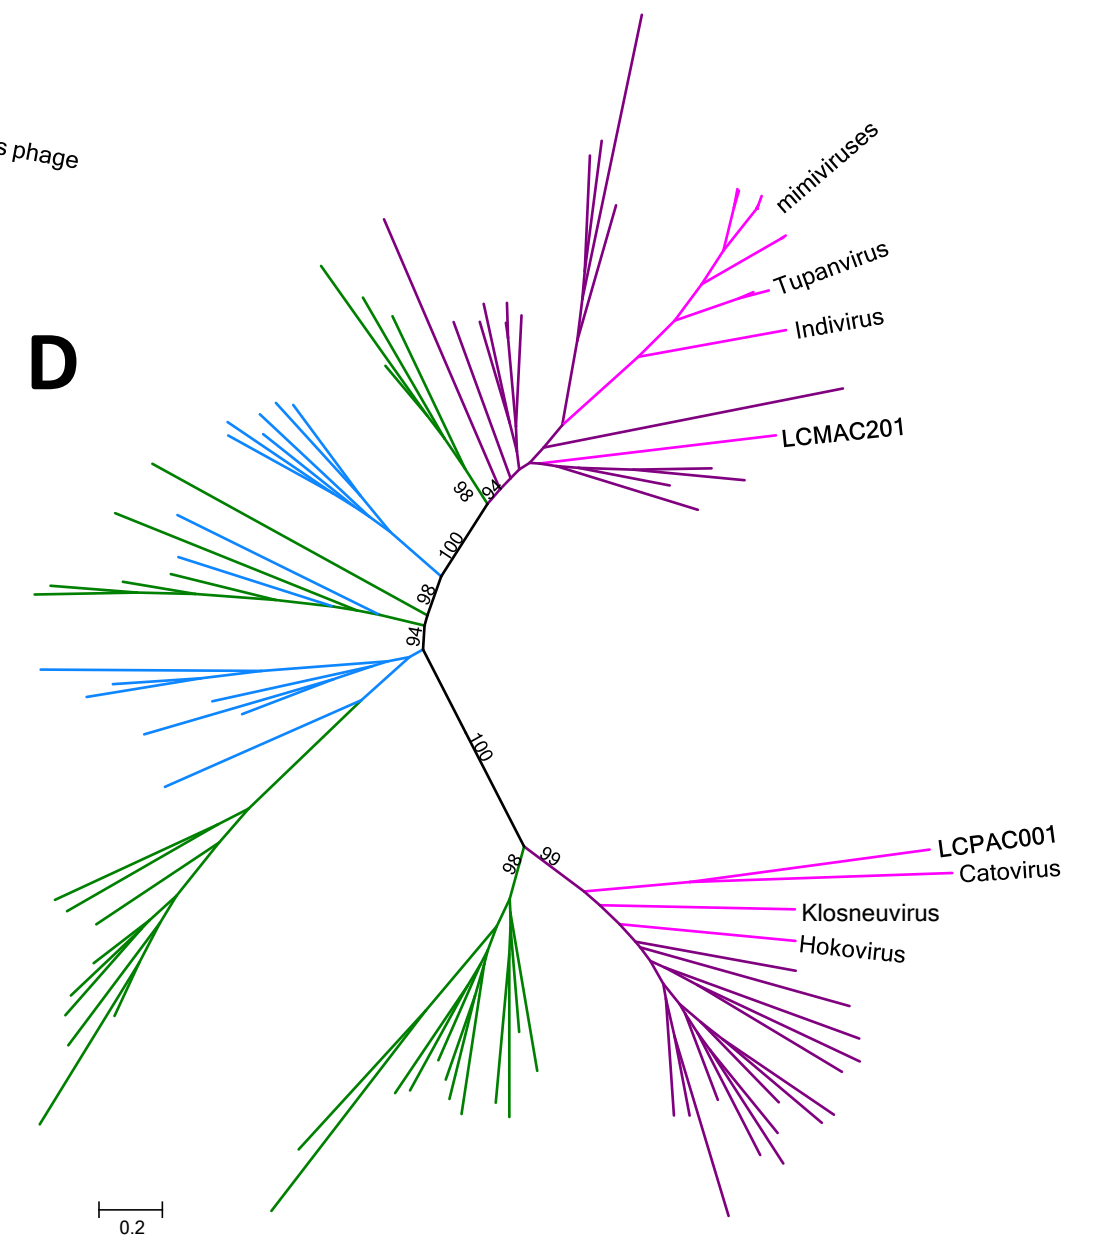

Marseilleviridae

Iridoviridae

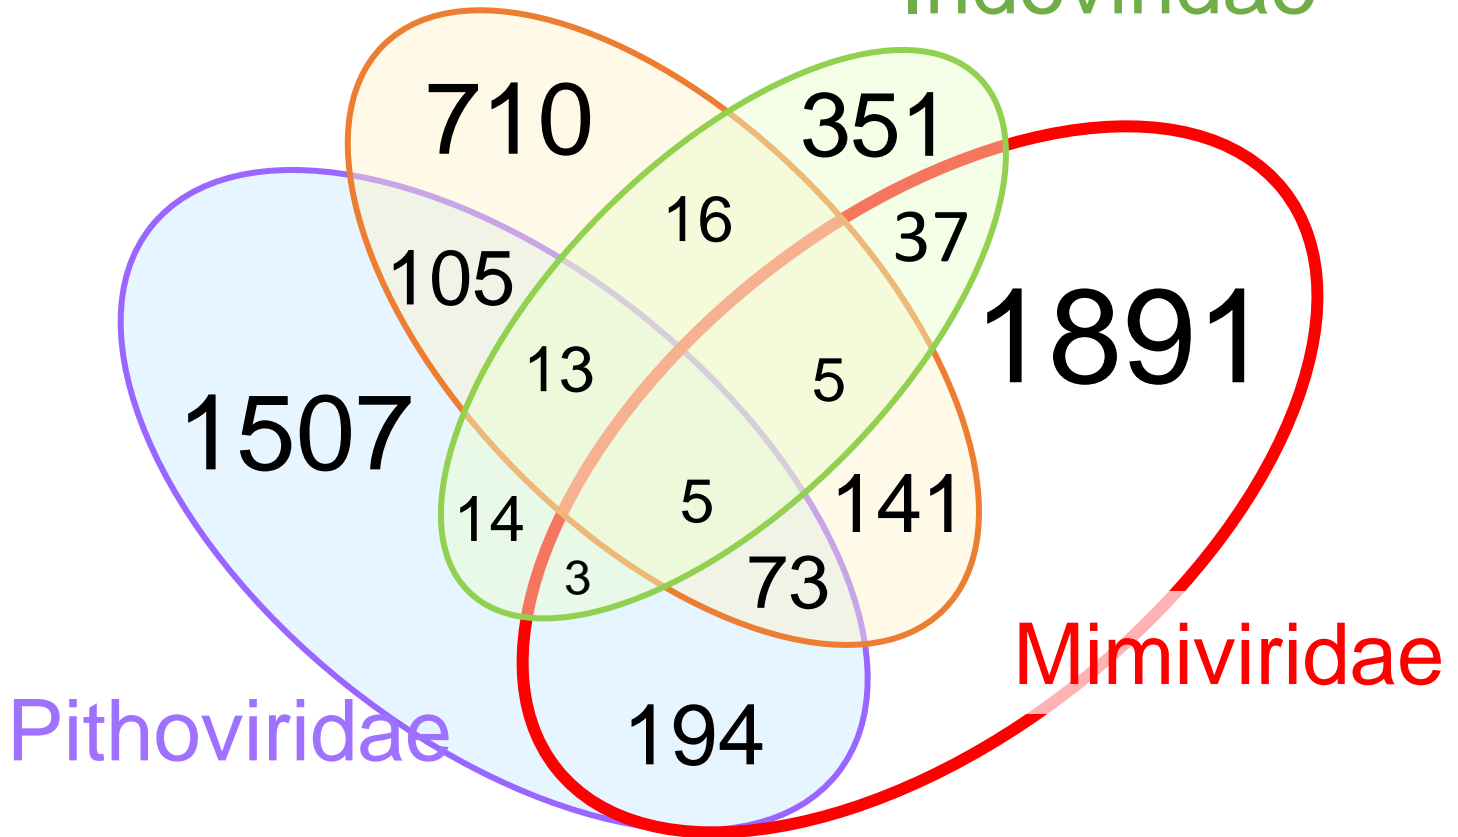

Pithoviridae

Mimiviridae

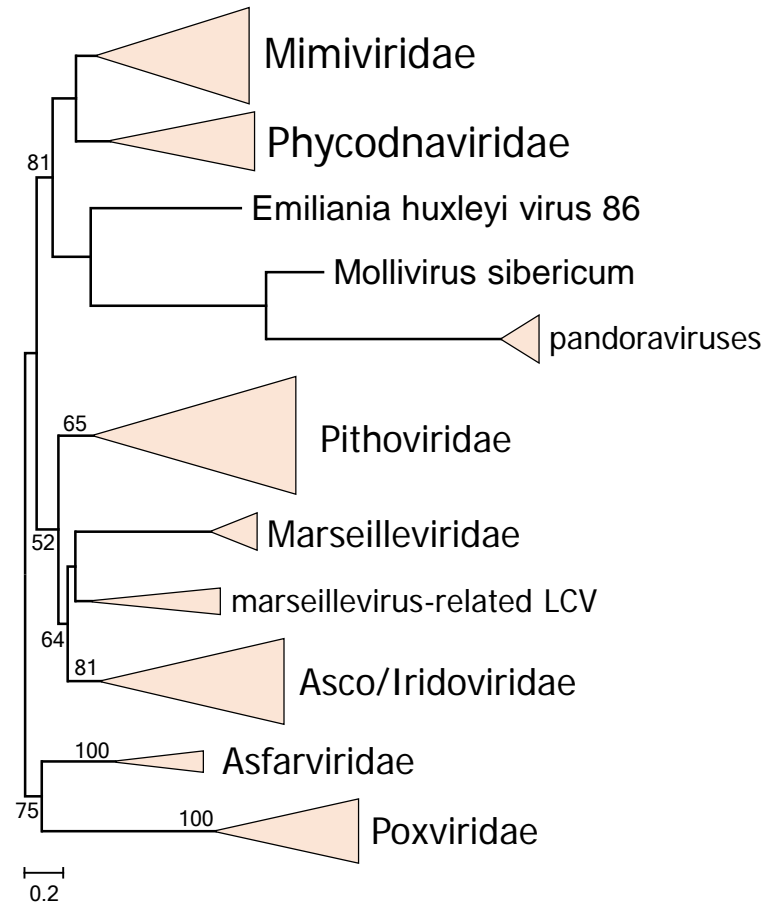

**A**

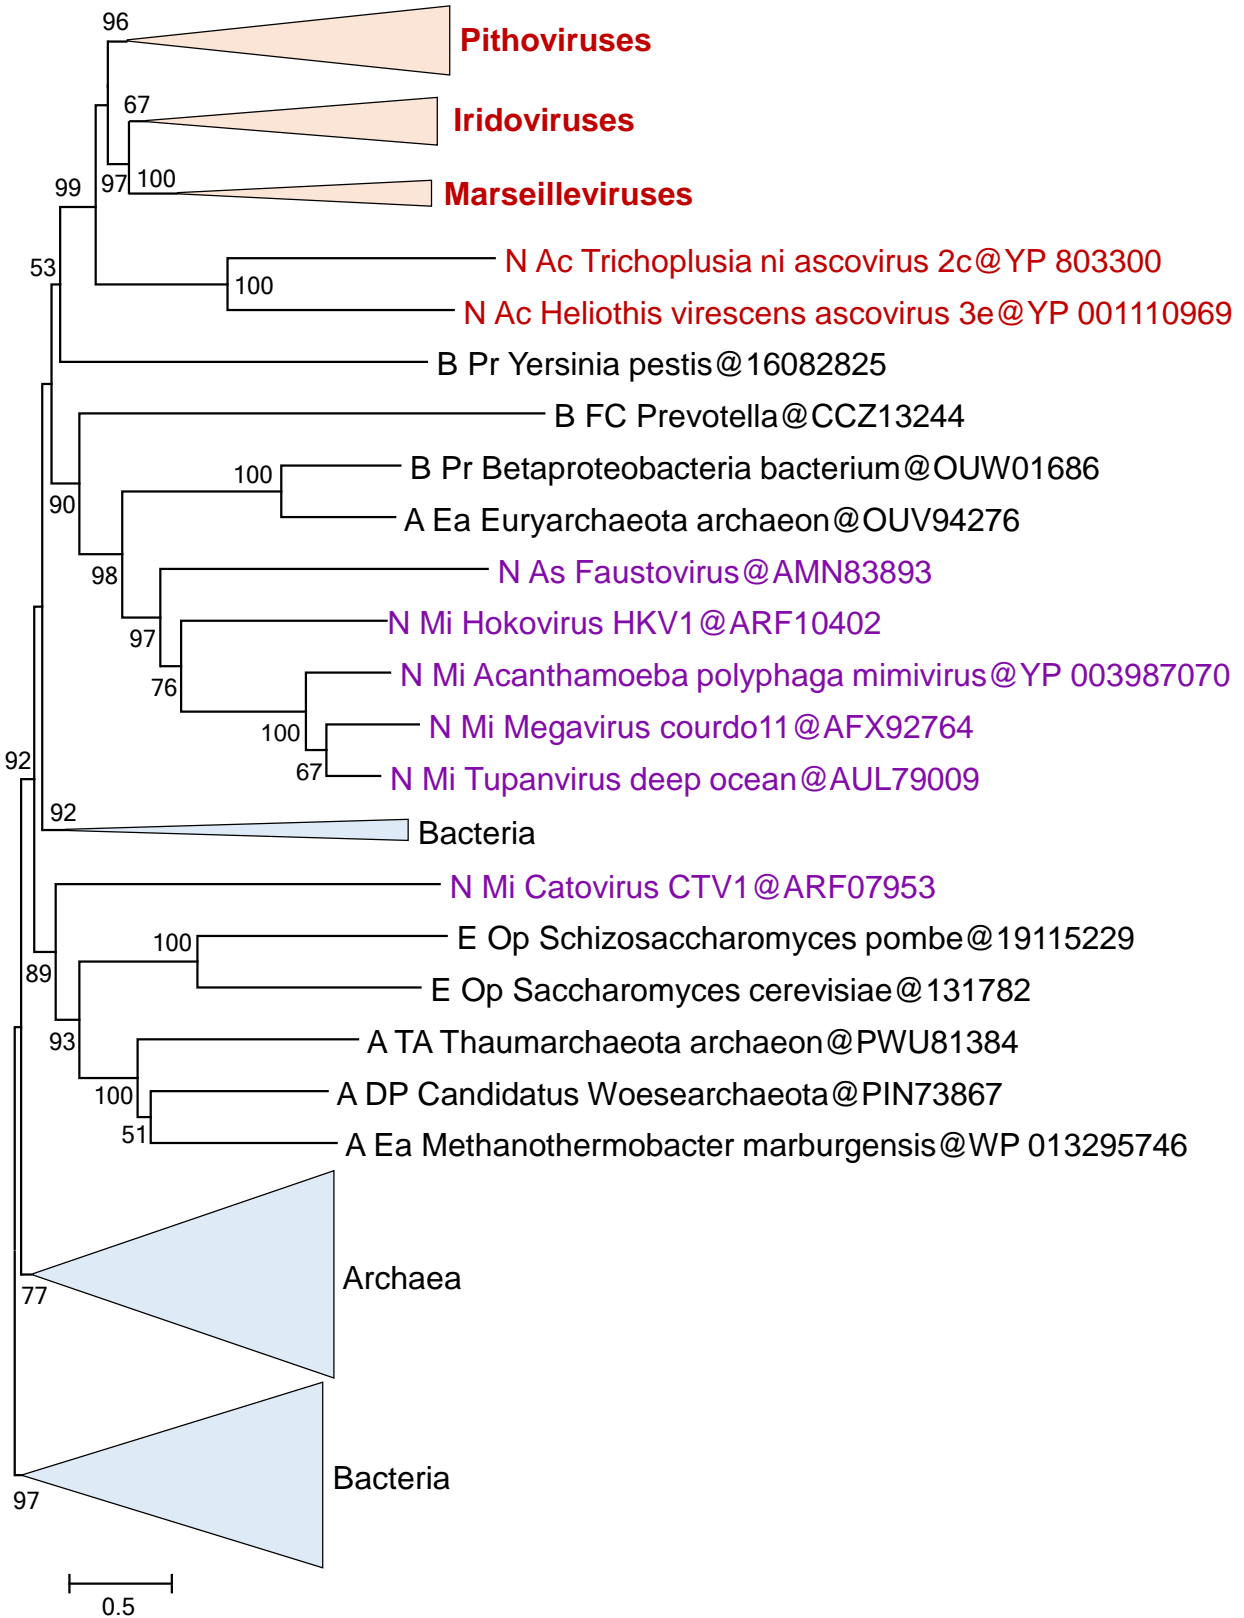

**B**

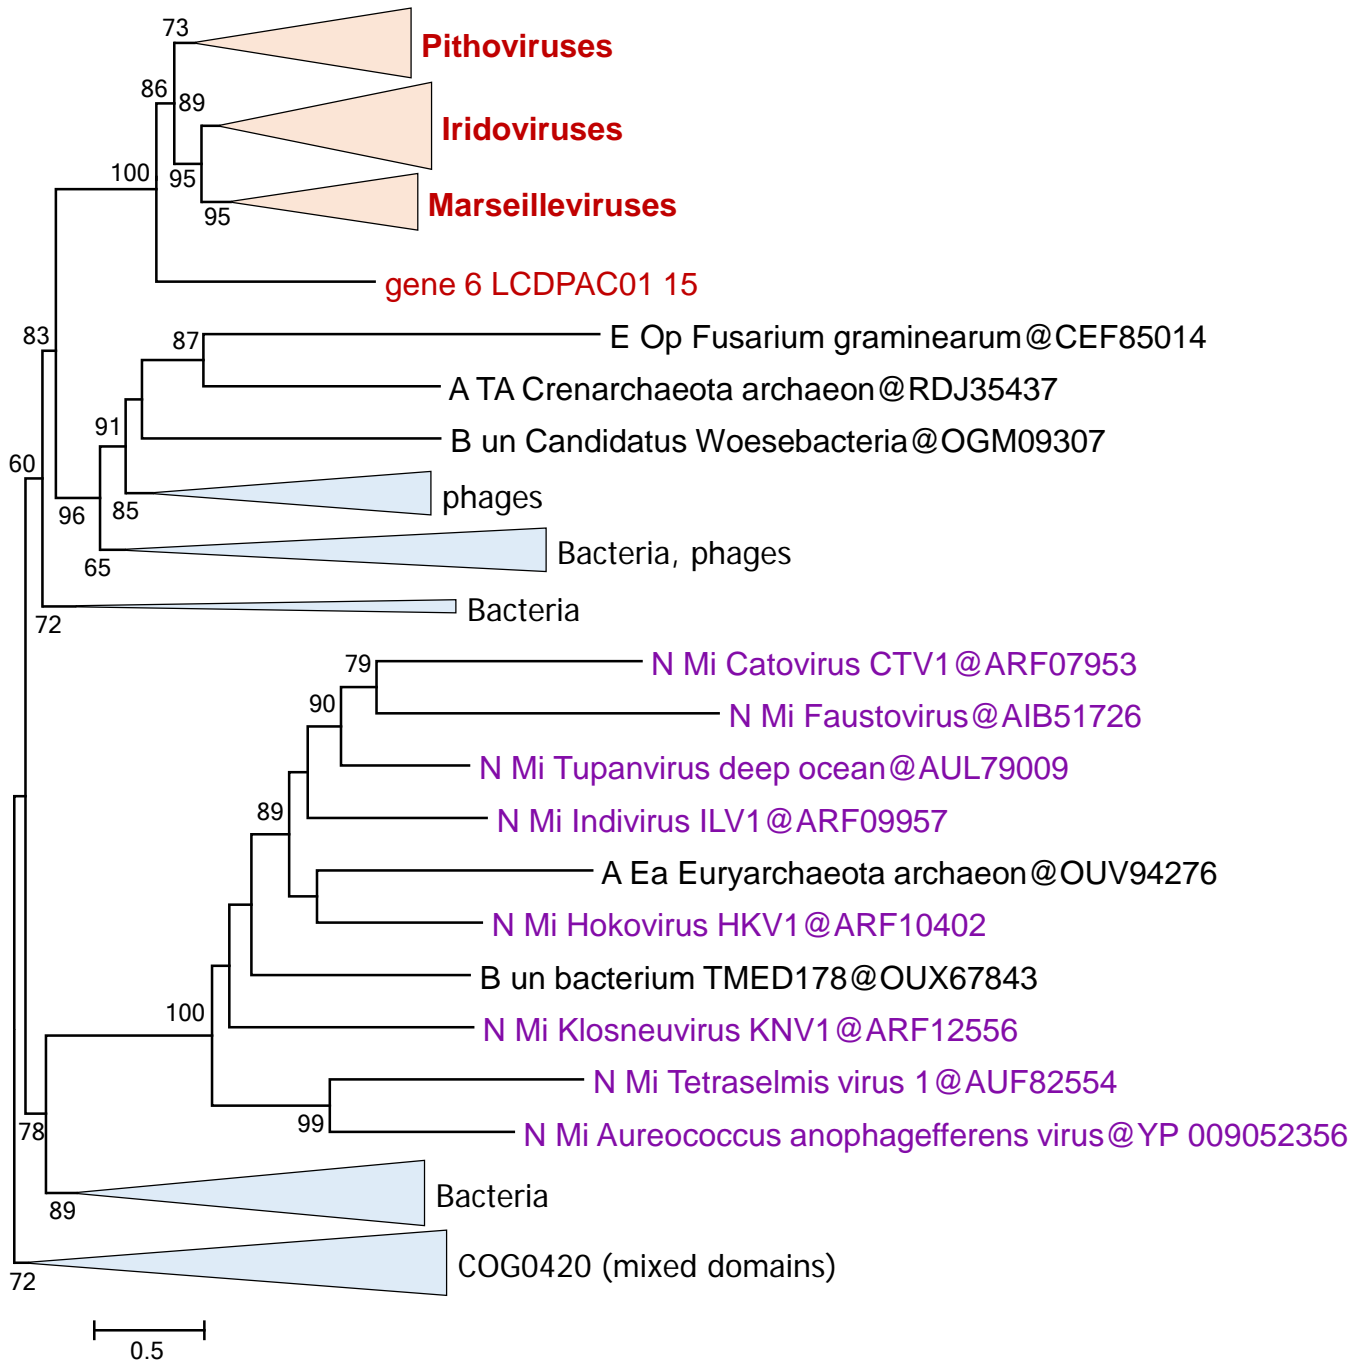

C

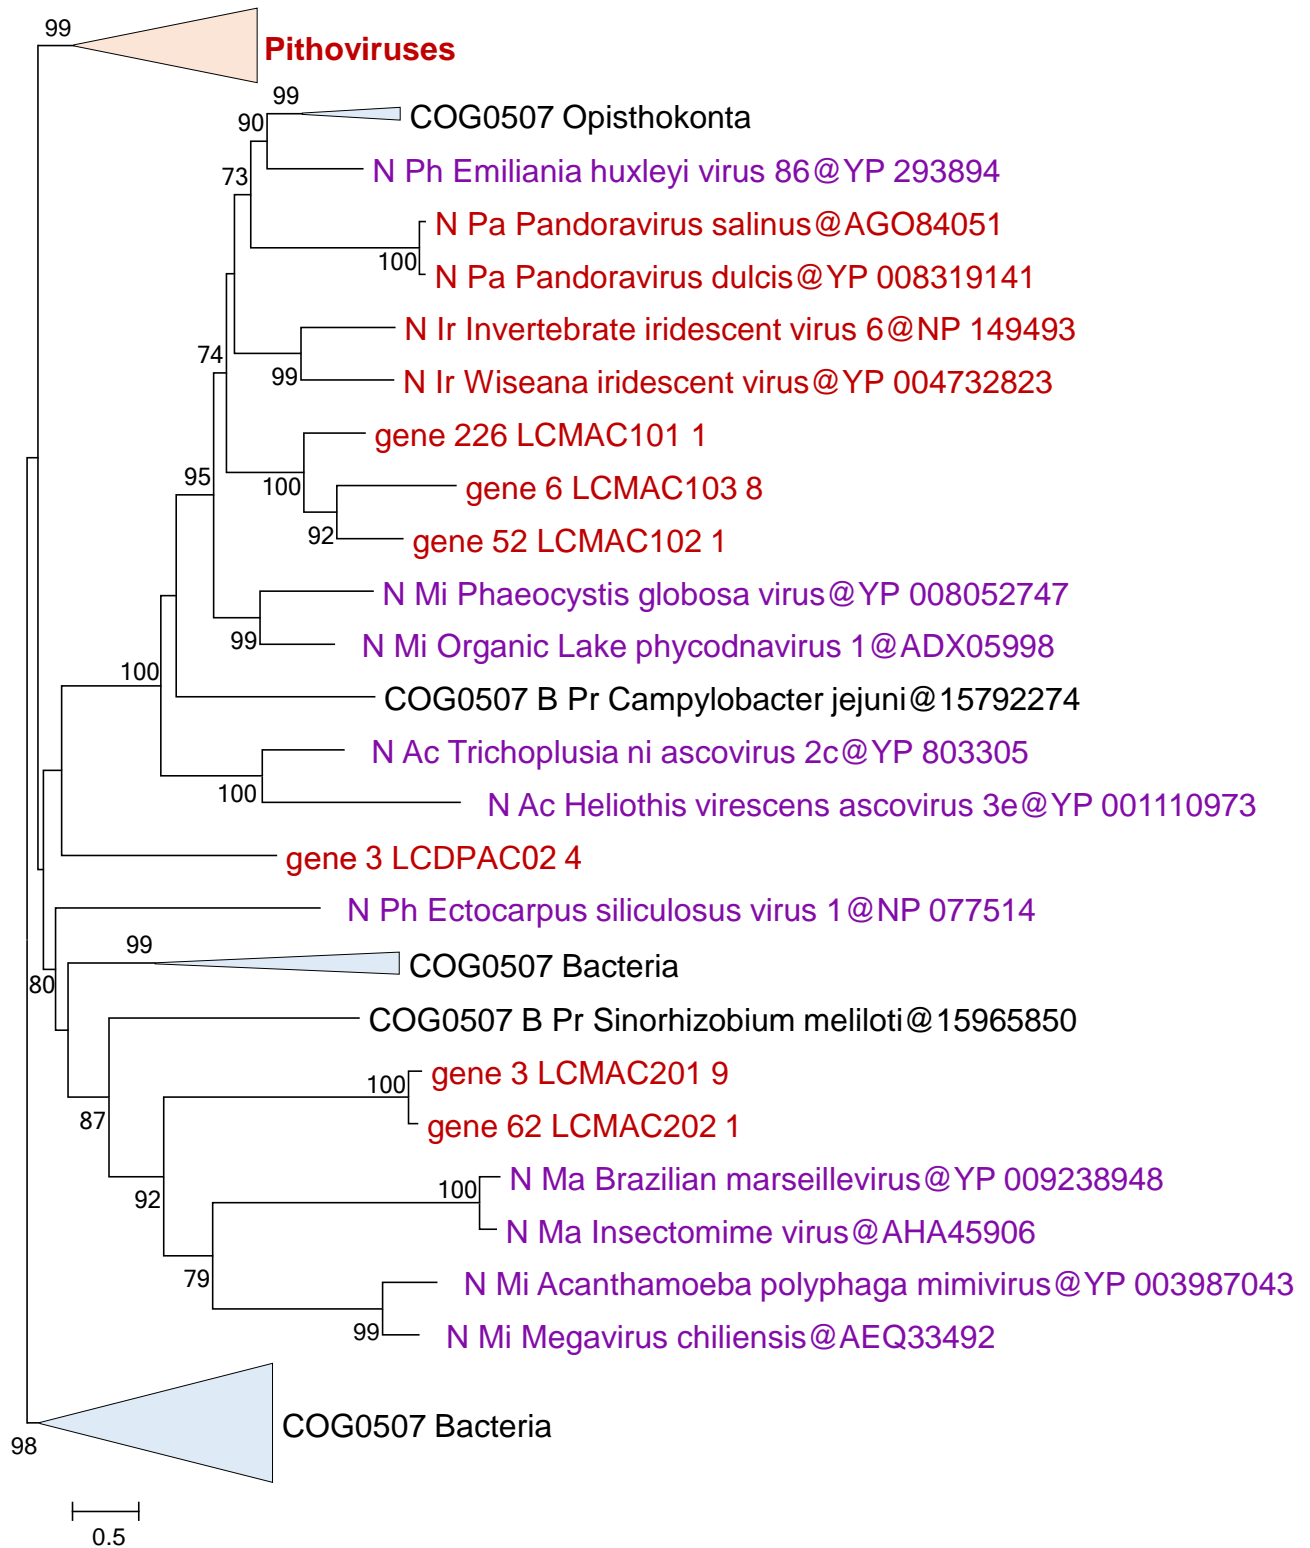

D

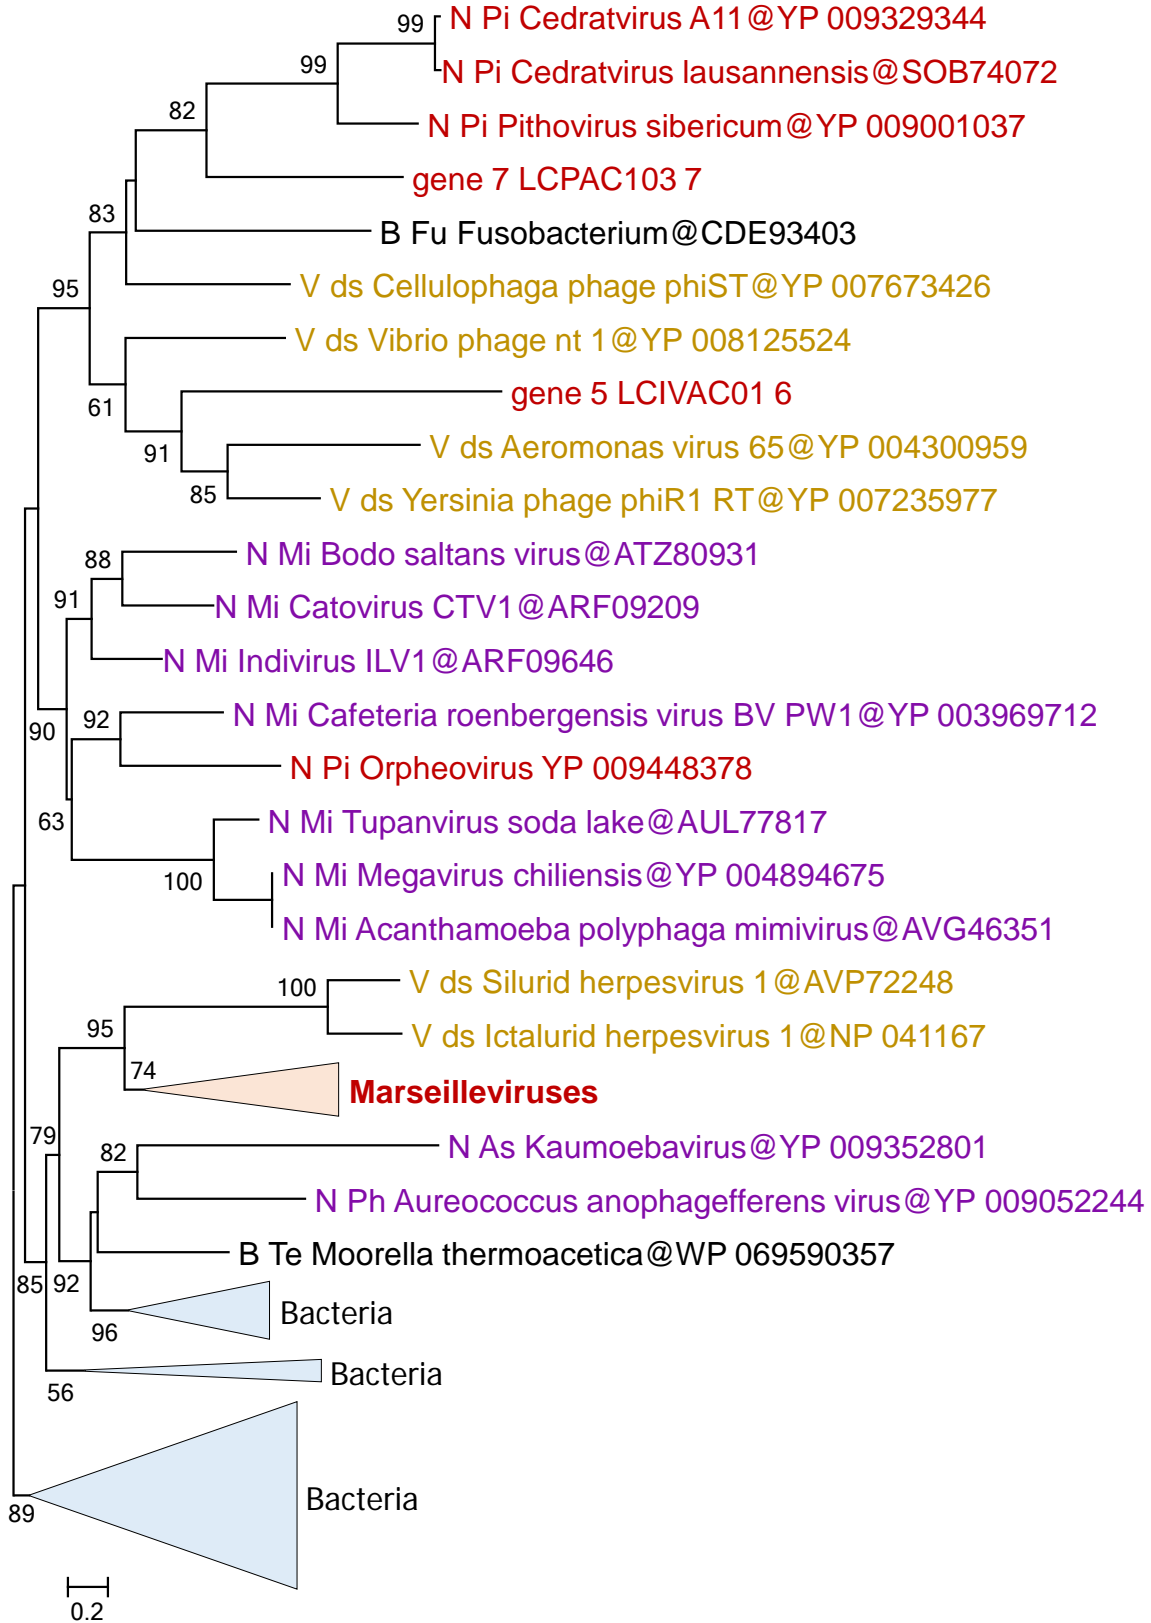

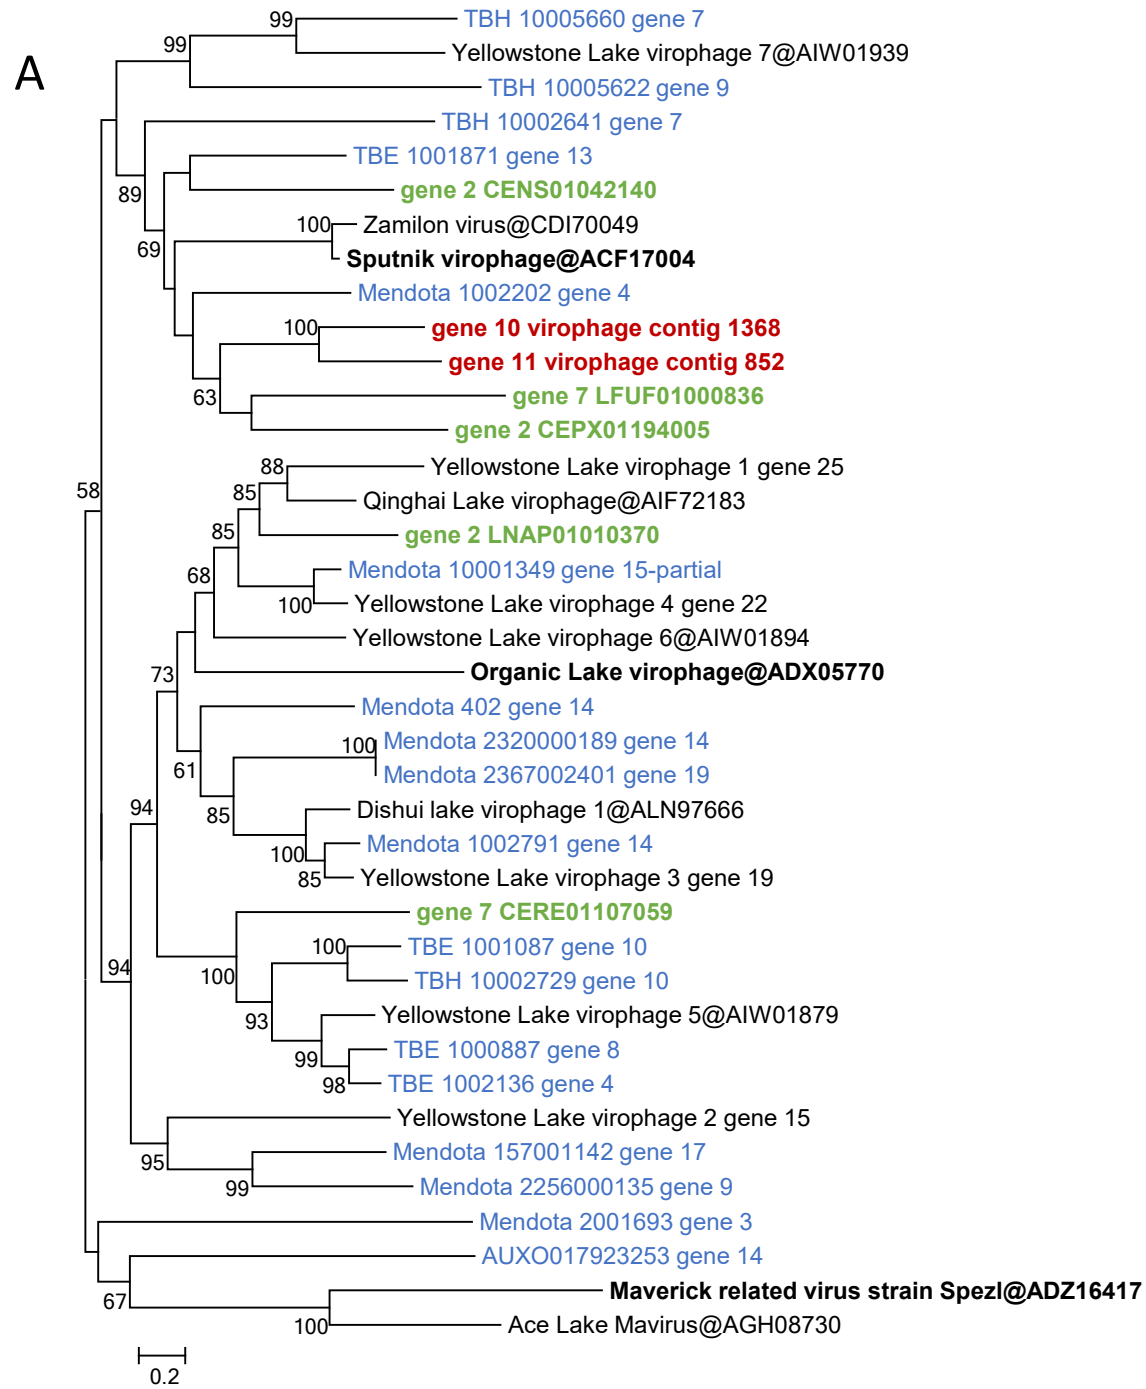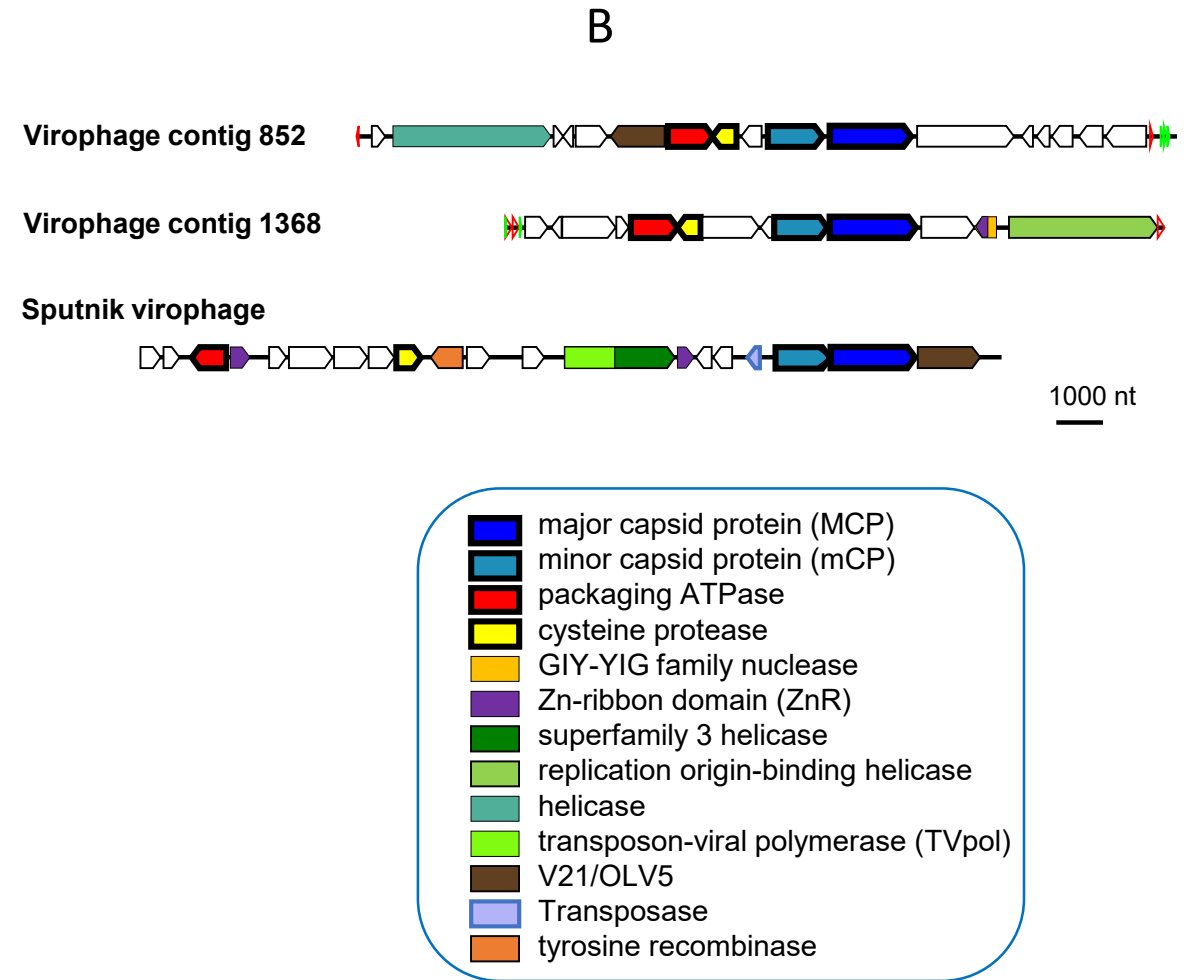

Source: http://biorxiv.org/content/10.1101/469403v1.full.pdf
